# Supplementary material for: An integrative analysis of transcriptomic response of ethanol tolerant strains to ethanol in Saccharomyces cerevisiae
Source: Royal Society of Chemistry journal article supplement (doi:10.1039/c5mb00622h), 2015-11-26
Supplement: c5mb00622h1.zip [file ESI1.xlsx]

## Sheet: Sheet1
Table S1. Significantly and differentially expressed genes in response to ethanol in reference strain
Genes	P.Value	FC
YPL130W	2.09204e-14	4.33736
YBR072C-A	1.14051e-13	3.3985
YAL037C-A	1.25403e-10	3.109
YPL027W	1.3109e-13	3.063
YHR079C-A	1.86031e-07	2.78546
YDL227C	8.19731e-11	2.67232
YNL318C	4.92172e-11	2.65437
YGL205W	1.09961e-13	2.63366
YOL104C	1.3275e-10	2.52615
YMR230W-A	1.16003e-06	2.50463
YOL024W	8.29411e-11	2.48217
YAL067C	4.71795e-16	2.44094
YOR394W	2.32329e-08	2.4239
YPL171C	1.8704e-15	2.28873
YFL052W	1.8236e-12	2.22865
YCR098C	4.76475e-15	2.15008
YOL155W-A	2.51379e-08	2.14636
YBR200W-A	5.14347e-08	2.12994
YFR023W	8.8868e-09	2.12933
YMR244W	1.663e-07	2.1224
YEL035C	1.95943e-07	2.10777
YNL146C-A	2.09459e-06	2.09193
YPR159C-A	9.94536e-11	2.06137
YBR040W	7.65891e-08	2.04979
YOR186W	4.31856e-09	2.04497
YDL114W	3.43697e-07	2.04323
YGL170C	5.88469e-06	2.04178
YMR095C	5.71661e-11	2.02655
YPL021W	1.27144e-07	2.01359
YOR214C	7.94883e-07	1.98956
YLR307W	1.78406e-09	1.97519
YFR032C	9.03701e-12	1.95472
YBR180W	7.85332e-08	1.93516
YCL026C-A	1.39728e-12	1.92663
YHL022C	3.55999e-10	1.92112
YMR242W-A	4.93478e-08	1.92025
YOL131W	1.2735e-12	1.88516
YBL071C-B	5.74661e-10	1.88172
YDR034C-A	5.30036e-09	1.87153
YBL101W-C	1.6258e-07	1.85743
YJL051W	1.27376e-14	1.84192
YHR175W-A	9.05284e-15	1.82584
YDR366C	4.63077e-10	1.81414
YDR523C	2.02024e-08	1.80947
YPL121C	0.000207568	1.80497
YJL153C	3.5785e-20	1.79359
YBR196C-B	8.18226e-07	1.77374
YPL033C	8.42367e-07	1.7727
YHR214C-E	8.03886e-06	1.76131
YBR186W	4.25323e-10	1.75591
YER185W	6.32938e-09	1.74279
YGR225W	2.48182e-10	1.73475
YLR307C-A	2.3262e-06	1.72808
YKL217W	1.00304e-15	1.72037
YER106W	6.70449e-13	1.71841
YGR146C-A	1.91701e-08	1.71201
YIL134C-A	4.83565e-06	1.6999
YJR120W	0.000249814	1.69231
YEL070W	4.39516e-17	1.68773
YGR226C	1.17201e-05	1.68702
YPR194C	2.80494e-15	1.6869
YPL241C	1.94545e-12	1.68179
YPR002W	1.06209e-11	1.6814
YLL005C	4.39774e-08	1.66644
YGL041C-B	1.66543e-08	1.66444
YJL157C	4.65183e-06	1.66431
YBR090C	0.000988836	1.66427
YJL219W	3.67101e-10	1.65253
YBR073W	4.38066e-12	1.64715
YML066C	7.42692e-06	1.64695
YEL069C	0.00123908	1.64565
YLR342W-A	3.71387e-15	1.64398
YJL047C-A	2.25255e-14	1.64273
YMR117C	4.37866e-07	1.63253
YIR028W	7.20726e-12	1.62641
YGL258W	0.000150267	1.61905
YNL277W-A	6.19783e-10	1.61774
YCL027W	1.98108e-09	1.61447
YGR204C-A	3.42109e-06	1.6042
YKL221W	1.57329e-09	1.59114
YOR255W	8.86245e-07	1.59111
YFR057W	0.0010927	1.58737
YMR094W	2.60966e-06	1.58445
YJL160C	1.03948e-10	1.58265
YBR196C-A	6.57486e-11	1.58164
YLR265C	7.50887e-09	1.57805
YHR014W	1.80053e-09	1.5759
YJL088W	2.43965e-11	1.57512
YMR104C	8.27592e-15	1.56802
YHR175W	1.4168e-16	1.56664
YDR281C	1.58297e-07	1.56105
YER078W-A	2.5808e-08	1.56008
YDR182W-A	3.02244e-08	1.55908
YCL066W	1.51093e-07	1.55705
YOL058W	9.55943e-15	1.55653
YHL024W	2.01696e-10	1.55159
YHR050W-A	8.60641e-09	1.54823
YHR049W	3.07289e-17	1.52759
YMR187C	2.64468e-10	1.52751
YNL270C	5.985e-06	1.52691
YHR136C	2.91644e-16	1.52256
YGL262W	6.26931e-05	1.52058
YOR100C	3.11942e-13	1.51894
YAL065C	6.76128e-05	1.51801
YNL042W-B	0.00116457	1.51587
YNL301C	3.4746e-11	1.50694
YGR273C	3.54186e-05	1.50669
YER104W	4.28161e-11	1.50376
YFL011W	1.59938e-06	1.503
YNL018C	5.45145e-08	0.510932
YMR011W	6.8099e-11	0.559186
YDL184C	1.51977e-11	0.59589
YNL210W	5.93471e-07	0.600956
YIL060W	9.52639e-08	0.605486
YAR073W	3.24217e-11	0.607382
YNL034W	1.78148e-09	0.615542
YBR221W-A	3.03383e-05	0.623084
YGR188C	7.35855e-12	0.624778
YBR219C	9.9081e-06	0.626361
YLR364W	6.0877e-13	0.635263
YKR039W	4.8283e-17	0.639218
YDL241W	5.83343e-14	0.641033
YPL256C	1.59153e-08	0.642027
YGL175C	3.83999e-06	0.651535
YHR066W	2.42024e-12	0.655251
YMR290C	1.82852e-11	0.656321
YHR216W	1.0417e-15	0.660653
YIL169C	1.85426e-11	0.661983
