# Supplementary material for: An integrative analysis of transcriptomic response of ethanol tolerant strains to ethanol in Saccharomyces cerevisiae
Source: Royal Society of Chemistry journal article supplement (doi:10.1039/c5mb00622h), 2015-11-26
Supplement: c5mb00622h1.zip [file ESI2.xlsx]

## Sheet: Sheet1
Table S2. Significantly and differentially expressed genes in response to ethanol in pmt7Δ/pmt7Δ strain
Genes	P.Value	FC
YPL130W	6.86483e-14	3.88669
YBR072C-A	2.61526e-13	2.99355
YOL104C	2.47402e-10	2.94823
YGL205W	5.44724e-14	2.81942
YAL037C-A	3.34744e-10	2.70384
YMR230W-A	1.28801e-06	2.66759
YPL027W	1.80303e-11	2.48816
YAL067C	1.51075e-15	2.38586
YPR159C-A	1.1596e-10	2.38383
YDL227C	1.60364e-08	2.35777
YHR079C-A	1.44293e-07	2.34971
YBR200W-A	1.44225e-08	2.33387
YCR098C	2.5946e-15	2.24524
YPL171C	9.10506e-15	2.21434
YNL042W-B	7.54295e-06	2.19971
YPR002W	9.7085e-15	2.1956
YOL024W	3.86415e-09	2.17266
YDR523C	4.0921e-09	2.14388
YMR095C	1.00152e-11	2.1108
YFL052W	4.46842e-12	2.08364
YOR376W-A	2.79954e-09	2.0426
YFR032C	1.12525e-11	2.03431
YMR117C	7.74571e-09	2.01961
YHL022C	4.86008e-10	1.96764
YOL131W	6.32596e-13	1.94096
YGR146C-A	4.33234e-09	1.91944
YPL021W	2.36424e-07	1.9179
YJL153C	4.60312e-21	1.9162
YBR196C-B	8.05129e-07	1.87353
YMR094W	1.58782e-07	1.86185
YOR072W-B	1.66438e-05	1.85743
YOR394W	3.59885e-05	1.85148
YKL217W	1.86935e-16	1.82226
YFR023W	1.50127e-06	1.81446
YBL071C-B	3.79816e-09	1.80706
YOL155W-A	8.75063e-06	1.7932
YJR053W	6.6115e-06	1.78974
YCL026C-A	1.42808e-11	1.77842
YBR186W	5.59431e-10	1.77182
YDR281C	6.06383e-09	1.75632
YEL070W	2.83769e-17	1.74292
YJL047C-A	7.92009e-15	1.71736
YIL134C-A	5.28404e-06	1.71597
YNL318C	6.16078e-07	1.71291
YJL051W	2.16045e-13	1.69025
YER106W	2.88459e-12	1.68911
YMR244W	4.59028e-05	1.68665
YLR342W-A	3.33065e-15	1.68586
YNL277W-A	9.41953e-11	1.65023
YHR105W	8.03429e-12	1.6463
YHR214C-E	6.03153e-05	1.64415
YEL035C	2.3113e-05	1.63924
YHR175W-A	1.1375e-13	1.63618
YGR273C	1.96637e-06	1.63572
YGR092W	9.34648e-17	1.62386
YMR104C	4.26716e-15	1.62319
YOR186W	8.23237e-06	1.62309
YJL160C	4.59673e-11	1.61928
YDR437W	4.89408e-08	1.61475
YBL043W	3.99727e-10	1.60195
YLR307W	1.37793e-06	1.59583
YLL005C	2.16644e-07	1.58558
YPR194C	4.29327e-14	1.57573
YPL201C	4.15326e-10	1.57101
YGL041C-B	6.48211e-08	1.56959
YCR101C	6.73831e-08	1.56954
YDR009W	9.60992e-13	1.56484
YEL075C	0.000357292	1.56402
YBL008W-A	0.000196096	1.56299
YLR445W	7.72396e-06	1.55529
YPR108W-A	4.49869e-06	1.55364
YCL069W	2.72897e-09	1.55123
YOL058W	1.60022e-14	1.54633
YNL301C	5.77053e-11	1.54137
YJL157C	7.98445e-05	1.53936
YDR042C	1.65445e-12	1.53875
YJL088W	1.6399e-10	1.53134
YHR136C	4.04006e-16	1.53009
YMR242W-A	7.84835e-05	1.52611
YPR162C	2.53339e-14	1.52582
YJR151W-A	0.00129056	1.51737
YLR265C	9.0449e-08	1.51669
YML066C	6.85693e-05	1.51349
YIL060W	9.86312e-10	0.47392
YNL018C	1.35925e-07	0.524329
YLR031W	2.26819e-06	0.53512
YNL034W	1.49888e-10	0.539713
YGR188C	4.89893e-13	0.542968
YBR221W-A	2.11085e-06	0.560404
YKL096C-B	0.000264121	0.571444
YIL046W-A	2.0773e-05	0.58814
YAR073W	1.50223e-11	0.590852
YOL114C	1.1427e-13	0.608596
YGL015C	2.96188e-07	0.625269
YHR216W	2.66554e-16	0.63541
YNL141W	4.27364e-09	0.636923
YOL152W	3.57745e-09	0.642068
YJL216C	1.7959e-09	0.643109
YBR219C	8.62464e-06	0.647503
YLR364W	5.34114e-13	0.649944
YKR039W	7.45062e-17	0.650027
YNR075W	8.42658e-05	0.656009
YNL095C	1.62528e-12	0.658987
YNL210W	2.14411e-06	0.661583
YIL169C	2.25412e-11	0.666031
YDL038C	2.84451e-07	0.666175
