# Supplementary material for: An integrative analysis of transcriptomic response of ethanol tolerant strains to ethanol in Saccharomyces cerevisiae
Source: Royal Society of Chemistry journal article supplement (doi:10.1039/c5mb00622h), 2015-11-26
Supplement: c5mb00622h1.zip [file ESI3.xlsx]

## Sheet: Sheet1
Table S3. Significantly and differentially expressed genes in response to ethanol in yhl042wΔ/yhl042wΔ strain
Genes	P.Value	FC
YPL130W	1.55294e-15	5.02752
YGL205W	4.61521e-15	3.59698
YAL037C-A	1.14582e-11	3.58348
YBR072C-A	6.86582e-14	3.47361
YMR230W-A	4.26546e-08	3.45555
YOL104C	5.00311e-11	3.37799
YHR079C-A	2.04759e-08	3.22166
YPR159C-A	5.70768e-12	2.6667
YPL027W	3.32006e-12	2.60737
YOR394W	1.60406e-08	2.5947
YPL171C	8.40684e-16	2.50842
YBR200W-A	4.20065e-09	2.35886
YFR023W	1.81575e-08	2.34521
YHR214C-E	1.27966e-07	2.33034
YDR523C	4.29091e-10	2.31628
YOR186W	1.21834e-09	2.2956
YGR225W	7.03238e-12	2.25369
YOR072W-B	1.1272e-06	2.24376
YOL155W-A	9.36281e-08	2.24101
YNL318C	9.31299e-10	2.23824
YBR040W	2.57779e-08	2.18354
YAL067C	1.62996e-14	2.18235
YPL033C	2.54662e-08	2.16044
YMR095C	1.69924e-11	2.14494
YCR098C	1.21766e-14	2.11733
YOR214C	3.5477e-07	2.10416
YFL052W	2.18274e-11	2.102
YFR032C	8.58544e-13	2.09925
YCL026C-A	1.93996e-13	2.09731
YLR307C-A	4.50999e-07	2.08521
YEL070W	1.39085e-18	2.08505
YEL035C	1.30527e-07	2.06891
YBR090C	6.33076e-05	2.02123
YDL227C	2.63169e-09	2.0173
YPR002W	1.62781e-13	1.99775
YMR244W	7.78508e-07	1.97666
YBR196C-B	1.11186e-07	1.96217
YBR186W	4.77633e-11	1.94314
YOL024W	2.43099e-09	1.93993
YOL131W	6.37311e-13	1.93707
YIL134C-A	2.55772e-07	1.9213
YBL101W-C	4.37434e-07	1.89313
YMR242W-A	4.41086e-08	1.87203
YDL114W	2.76192e-06	1.85065
YER106W	5.16492e-13	1.82635
YHL022C	1.53659e-09	1.82385
YKL221W	7.53076e-11	1.81647
YOR376W-A	1.7726e-07	1.8085
YJL047C-A	1.70259e-15	1.80518
YJL153C	3.77497e-20	1.79528
YMR094W	3.93332e-07	1.79281
YBL071C-B	7.77933e-10	1.78951
YLR156W	2.80776e-13	1.78862
YGR204C-A	4.84421e-07	1.78843
YOR255W	9.85657e-08	1.78681
YKL217W	5.0615e-16	1.76358
YLR307W	4.44137e-08	1.7611
YOR268C	1.406e-05	1.75429
YGL041C-B	3.83623e-09	1.75048
YPR108W-A	5.0623e-07	1.75044
YHR139C	6.56652e-11	1.74564
YJL160C	9.88243e-12	1.74056
YJL051W	3.77347e-14	1.73784
YMR322C	3.23457e-14	1.73772
YLR342W-A	6.0141e-16	1.72938
YLR012C	8.5659e-11	1.72638
YFR057W	0.000957663	1.72338
YGR226C	8.83647e-06	1.71374
YHR105W	2.31214e-12	1.70453
YPR194C	3.56308e-15	1.70251
YDL079C	1.0399e-12	1.7005
YMR104C	7.69045e-16	1.69635
YMR206W	1.27962e-08	1.68983
YBR180W	1.49637e-06	1.6786
YHR175W-A	4.11132e-14	1.67495
YNL301C	2.63504e-12	1.66744
YNL042W-B	0.000150948	1.66374
YDR042C	2.07048e-13	1.66036
YLR265C	1.48477e-09	1.65849
YER185W	3.06747e-08	1.65076
YDR437W	6.06026e-08	1.64268
YGR146C-A	6.46106e-08	1.64255
YML116W	3.18151e-14	1.63874
YJL219W	6.00539e-10	1.63474
YLR108C	6.52484e-16	1.62333
YNL277W-A	2.14056e-09	1.61826
YCL069W	9.58345e-10	1.61051
YBR050C	1.36466e-17	1.60955
YCL048W	9.45113e-07	1.60665
YPL021W	5.31064e-06	1.60579
YGL170C	0.00065241	1.59889
YFL040W	1.11329e-05	1.59859
YBR073W	9.98106e-12	1.59319
YLL005C	1.46912e-07	1.59003
YOR289W	6.23223e-19	1.58449
YJR120W	0.000649457	1.57913
YDR366C	7.28194e-09	1.57843
YOL162W	1.00234e-07	1.57435
YDR065W	9.24446e-13	1.57114
YCL027W	5.0318e-09	1.5679
YNL230C	3.84356e-12	1.56526
YDR263C	3.34541e-11	1.56511
YHL024W	3.6854e-10	1.56371
YHR050W-A	1.07412e-08	1.55942
YBR047W	1.4706e-17	1.55537
YHL048C-A	3.60661e-11	1.55404
YFL030W	2.16544e-12	1.55396
YJR005C-A	5.1607e-13	1.55172
YDR009W	3.74402e-12	1.54676
YBR296C	5.76642e-10	1.54368
YOR134W	1.48941e-07	1.54282
YGL033W	0.00720182	1.54211
YAL065C	8.70151e-05	1.54134
YLR411W	2.0767e-10	1.53571
YML066C	1.37405e-05	1.53487
YEL073C	4.50436e-15	1.52991
YOR100C	3.72718e-13	1.52472
YPR162C	1.35803e-14	1.52177
YGR144W	1.01473e-08	1.52056
YBR128C	4.22151e-09	1.51983
YMR117C	4.02221e-06	1.51709
YNL270C	9.20946e-06	1.51602
YMR013W-A	8.88045e-07	1.51512
YDL085W	9.35235e-13	1.5142
YDL024C	1.25029e-13	1.51297
YPL165C	6.14635e-07	1.51268
YDR247W	6.03875e-15	1.51251
YGL101W	1.93816e-13	1.50623
YJL088W	1.4133e-10	1.50534
YFL011W	1.55791e-05	1.50529
YML131W	1.62783e-17	1.50477
YNL024C	1.73506e-11	1.50405
YER078W-A	1.53785e-07	1.50036
YNL018C	3.25428e-07	0.534398
YNL141W	1.15882e-11	0.535912
YAR073W	4.87818e-12	0.538345
YMR290C	2.50011e-13	0.590031
YMR011W	6.14585e-10	0.600437
YIL096C	3.24807e-12	0.615124
YGR188C	6.25943e-12	0.62092
YPL256C	3.21811e-09	0.621541
YNL034W	1.04484e-08	0.626233
YHR216W	4.01791e-16	0.6303
YNL210W	1.78408e-06	0.637515
YIL169C	7.42365e-12	0.643258
YKR039W	7.58662e-17	0.645009
YHR066W	9.44723e-13	0.645158
YEL066W	1.03594e-15	0.64653
YNL095C	1.14581e-12	0.652885
YDL184C	1.38135e-10	0.653514
YER110C	3.2768e-15	0.659779
YDL241W	1.81803e-13	0.665445
