# Supplementary material for: An integrative analysis of transcriptomic response of ethanol tolerant strains to ethanol in Saccharomyces cerevisiae
Source: Royal Society of Chemistry journal article supplement (doi:10.1039/c5mb00622h), 2015-11-26
Supplement: c5mb00622h1.zip [file ESI4.xlsx]

## Sheet: Sheet1
Table S4. Active subnetwork responsive to ethanol in reference strain (N1)
Interactor A	Interactor B
PET9	COR1
MCM7	MCM2
RFS1	GPX2
YRO2	ATG22
PET9	COX9
HAP3	VMA1
GET3	GRX7
PET9	DLD1
NHP6b	SRP14
GIR2	RBG1
IWR1	RPB5
RFS1	FMP45
MTC5	SSA3
SAS10	DUG2
GPX2	FMP45
ARL1	DOP1
YDL121C	GET3
ERP2	KAP123
MTC5	RNQ1
YAL044W-A	GRX4
RFS1	GPA2
EMP24	ERP2
ERG25	ERP2
CEG1	SSA3
NHP6b	IOC3
SPT4	HIR1
GET3	YHP1
GRX2	GET3
SHR3	SUR2
PMT7	SHR3
RBG1	YGR250C
MCM7	ERG26
PHO4	GLK1
YEL023C	VMA1
IOC3	PBP4
VMA1	VMA3
TOS3	PDI1
RPB5	SPT4
ERP3	EMP24
PET9	COX6
EMP24	PBP4
PHO4	PHO2
GPI8	SUR2
BUD32	SEC18
YCK1	NCL1
RAD3	VMA1
PHO4	CCT4
YCK1	SKT5
TOS3	IWR1
SUR2	CHO1
GPI8	VMA3
EMP24	SHR3
PMT7	CHO1
ERP2	KAR2
GPI8	CHO1
CRH1	GET3
ERG25	SHR3
SRP14	ERG11
TFB3	RAD3
COX9	COX6
EMP24	SUR2
YCK1	PBP4
CPR2	GET3
RNR3	RNQ1
RAD3	HOR2
YCK1	IWR1
SHR3	ERG11
CPR7	SSA3
YCK1	SAS10
UTP22	BFR2
UTP22	UTP4
HAP3	HAP4
CHS7	SHR3
UGA2	YKL023W
FAF1	SAS10
YCK1	AAD4
SUC2	GET3
YDL012C	DLS1
CAB3	SSA3
ERV1	CYC7
SUR2	ERG11
IDP1	KAR2
MET18	VMA1
ERG25	CHO1
GPI8	ERG11
CEG1	PRP43
SSY1	YCK1
CCT3	CCT4
CHS7	SUR2
CMR1	CCT3
INO1	GET3
RNR1	RNR4
YCK1	SVF1
SUR2	SNL1
ERG26	ERG25
YKT6	SEC18
FAF1	BFR2
PET9	SDH2
FAF1	UTP4
YCK1	GTT3
PRP43	UTP22
GPI8	SNL1
GIR2	YIL152W
CIT2	MDH1
BUD32	GRX4
EMP24	ERG25
NHP6b	VPS1
TOS3	YGR153W
SHR3	SOP4
CCT3	DOP1
DPB4	DLS1
JHD2	SAS10
VMA1	RAV1
GET3	MSN4
NNK1	PDI1
MAE1	CCT4
YCK1	YER079W
ERG26	ERG11
DOA4	AVT1
SRP14	SRP21
MAE1	VMA1
PET9	DIC1
YCK1	PHO4
RNR1	RNR3
HOG1	SMP1
RPB5	IFH1
NNK1	SAS10
MET18	RAD3
SKT5	IMD3
YCK1	MIG2
ERG25	ERG11
YRO2	SUR4
PMT7	STE24
NNK1	GDH2
YCK1	YGR021W
CHO2	ERG11
GPI8	STE24
YDL241W	APE2
YCK1	YGR026W
EMP24	SNL1
PHO4	TMA108
PHO2	BAS1
GPI8	LAC1
SUR2	CAB3
PXA2	VBA4
PET9	AAC1
VPS13	VMA1
ERG25	SNL1
PET9	ADH3
YCK1	MGA1
PET9	NDE1
FAF1	UTP22
YLR297W	GET3
RPB5	ERG13
YCK1	OTU2
RPB5	ERG5
PRM10	EMP24
YCK1	TDA3
BUD32	IMD2
YCK1	TOM71
PET9	COX5a
RBG1	SSB2
RAD3	MDH1
FMP45	YLR326W
RNR3	MAS2
EMP24	STE24
MIA40	CYC7
EMP24	NMD5
YEL023C	URA1
CHS7	SNL1
IMD3	GDH2
SSB2	SSA3
IES2	SSA3
MIA40	KAP123
KDX1	GAT1
ERG25	STE24
PHO4	RPS27a
FMP45	FMP27
RPB5	RPC19
TDA1	PDI1
ERG25	LAC1
DPB4	IMD3
YCK1	LYS1
YNL155W	NPL4
SMF3	VMA3
SUR2	SUR4
NCS2	DUG2
ERG11	SOP4
YML131W	GDH2
IOC3	VPS1
PMT7	SUR4
YCK1	PRM10
PHO4	VPS1
NHP6b	RPC34
RPC34	RPB5
YCK1	GZF3
GPI8	SUR4
PET9	CYT1
CAB3	UTP22
COR1	CYT1
PIM1	IDH2
ERG11	STE24
CEG1	VPS1
ERD1	SUR4
COX9	COX5a
YCK1	AVT1
ERG11	LAC1
TOS3	TRZ1
GPA2	YLR326W
UGA2	VPS21
MIA40	ERV1
PET9	FSF1
CPR7	THP2
MCM2	HAT1
CHS7	STE24
YGL242C	BAS1
ERG11	CAB3
KAP95	KAP123
TOS3	YLR030W
YCK1	YKL023W
CPR7	GVP36
AVT4	SHR3
RPA190	RPB5
LAC1	SNL1
TOS3	YLR257W
SRP14	MIM1
KDX1	STE12
ERG11	MNN4
MUK1	SEC18
ESA1	GLK1
CGI121	GRX4
SPT4	HOG1
EMW1	VMA1
CCT3	CCT5
EMP24	SUR4
PRP43	IMD3
YCK1	MIA40
KDX1	SKN7
UTP22	IFH1
ERG26	ERG6
GPX2	PDR12
PET9	QCR2
QCR2	COR1
KEL3	YRO2
SSB2	DOP1
ERG11	YBT1
MUK1	RNQ1
YCK1	YKR045C
SWC4	BDF1
YCK1	TRZ1
ERG25	SUR4
PRP43	FPR3
RAD3	AAC1
CCT3	CAB3
RNR4	KAP95
NNK1	YIL151C
UTP4	SSB2
MAS2	MAS1
YCK1	YLR030W
ERG25	ERG6
YCK1	YLR125W
AVT4	CHO1
PHO4	GUA1
YCK1	HAP1
SNO4	SNZ3
YCK1	YLR257W
SRP72	SRP14
CYT1	SDH4
ERG25	ERG5
BUD32	CGI121
FMP45	SVL3
ISR1	PBP4
YCK1	ILV5
ERG11	ERG6
FMP45	PDR12
RNR3	MAS1
SRP14	SRP54
CHS7	SUR4
YCK1	STP3
TOS3	HDA1
TOS3	CRZ1
YCK1	LEU3
PRP43	RPC19
EMW1	KAP123
THP2	IMD3
ESA1	SVF1
IMD3	IMD2
ERG11	ERG5
APE2	MDH1
YCK1	MFT1
HOT13	MIA40
THP2	MFT1
YCK1	YML096W
SWC4	EAF7
AVT4	ERG25
BUD32	YMR226C
SEC11	SUR4
VBA4	YMC1
DBP5	RAD3
YCK1	SUB1
ERG11	SCS7
YCK1	SIP5
KAP123	IDH2
RAD3	IDH2
HOG1	NMD5
GIR2	ISR1
ESA1	GRX4
SIP5	EGD2
YCK1	YMR226C
GPA2	PDR12
AVT4	ERG11
HAT1	KAP123
PRP43	RIO1
SSB2	ZUO1
DLS1	MFT1
YCK1	CRZ1
RPA190	PRP43
LAC1	SUR4
MUK1	SNZ3
GDH1	CEG1
ESA1	YGR001C
SKN7	CRZ1
SWC4	ESA1
MAS2	ATG2
CPR7	MFT1
YCK1	SKO1
AVT4	SNL1
YCK1	JJJ1
ESA1	RNR4
TGL5	ZUO1
YCK1	NBA1
ESA1	OTU2
GZF3	HDA1
YCK1	CUE5
CCT3	YNL155W
YCK1	VPS21
YCK1	RIO1
EAF7	MTC1
NNK1	YML096W
RNR4	YPL191C
EMW1	KAR2
KDX1	MSN2
AVT4	STE24
CRZ1	NMD5
LYS9	KAR2
CCT3	IRC10
YGR250C	SRP72
CAB3	SCS7
YCK1	YPL071C
YCK1	OYE3
ZEO1	MTC1
MSN4	EAF7
TGL5	KAR2
YCK1	CTI6
KDX1	CRZ1
NNK1	CRZ1
CCT3	CIR2
YIR035C	HAT1
STP3	NTE1
NNK1	SKO1
HOG1	HOT1
MFT1	IMD3
SNA3	PDR12
SOP4	PDR12
ERG5	ERG6
NNK1	TRM13
HOG1	SKO1
EAF7	KAP95
AVT4	SUR4
CYT1	CCP1
MUK1	YKL151C
SRP72	SRP21
CDC31	VPS13
PXA1	PXA2
NNK1	CUP9
SRP54	SRP21
ERG13	NCS2
PSR2	RPA190
MSN2	EAF7
ESA1	YLR257W
YBT1	PXA1
ESA1	MFT1
ESA1	FPR3
RPA190	FPR3
MUK1	CAT2
RPC19	RPC34
GFD1	DBP5
ESA1	SIP5
YML131W	HAT1
SCS7	TGL5
VPS21	IDP3
TGL5	SSB2
EAF7	ESA1
RPA190	RPC19
ESA1	IES2
ESA1	ABZ1
SSB2	HAT1
EAF7	RGL1
COX5a	YPL216W
ESA1	YPR089W
ESA1	MET16
SRP54	SRP72
