# Supplementary material for: An integrative analysis of transcriptomic response of ethanol tolerant strains to ethanol in Saccharomyces cerevisiae
Source: Royal Society of Chemistry journal article supplement (doi:10.1039/c5mb00622h), 2015-11-26
Supplement: c5mb00622h1.zip [file ESI5.xlsx]

## Sheet: Sheet1
Table S5. Active subnetwork responsive to ethanol in pmt7Δ/pmt7Δ strain (N2)
Interactor A	Interactor B
RBG1	SSA1
SSA1	SSA3
PET9	COR1
KAP104	SSA1
HPC2	SSA1
KAP104	PET9
SWC5	SSA1
RPO21	SSA1
GET3	GRX7
PET9	DLD1
DOP1	SSA1
RSC3	SSA1
DPB4	SAS3
SNF1	SSA1
RNQ1	RPO21
PDB1	DOA4
SSA1	KRE28
STP22	DOA4
YDL121C	GET3
SSA1	DLD3
PET9	RIP1
COR1	RIP1
SWC5	SWR1
CPR5	GET3
SLX5	NCB2
RAV2	VMA1
PET9	FMP10
KAP104	KAP123
SSA1	OTU1
NRG1	SNF1
AFG3	GET3
YEL023C	VMA1
VMA1	VMA3
PMR1	PET9
YBR016W	PRP43
ENV11	SSA1
PHO4	NFS1
RTR1	RPO21
SSA1	UTP22
PHO4	GLK1
GPI8	VMA3
YPP1	SSA1
YDL012C	BNA6
KGD2	KAP123
GPI8	CHO1
PRP43	YCR016W
RBG1	YGR250C
SWC4	SWC5
SNF1	MIG3
SNF1	GLN3
TOM71	SSA1
SPT2	PUF6
PET9	COX6
MVB12	STP22
YCK1	NCL1
PHO4	SNF1
CRH1	GET3
DOP1	KEX1
UTP10	SSA1
YCK1	BIT2
SWC4	SWR1
YCK1	SLX5
RPO21	SLT2
RNR3	RNQ1
EAF5	SWC4
YCK1	RPO21
SSA1	YJR096W
GLN3	PMR1
RPO21	IKI1
PET9	MIR1
LYS4	ZUO1
PRP43	SPT2
SUC2	GET3
CTK1	SSA1
MIR1	KAP104
STP22	CPS1
NHP6b	CBF1
YHR097C	CPR5
INO1	GET3
SPT2	UTP22
SNF1	TOM71
SPT2	CYS4
YRB2	CPR5
GPA2	YOR1
YCK1	GTT3
ESS1	RPO21
CWC23	PRP43
VPS45	KEX1
ATG26	SSA1
DOA4	AVT1
VMA1	RAV1
YDR132C	YJL218W
NHP6b	TFA2
KAP95	SSA1
DID4	CDC36
PRP43	UTP22
GET3	MSN4
RAV2	RAV1
PET9	DIC1
YCK1	RTR1
YER134C	ATG7
CTK1	RPO21
YCK1	BUD27
SPT2	IMD2
YCK1	YFL034W
KEX1	SMI1
YCK1	PHO4
RPO21	TFA2
GPI8	LAC1
SSL1	RPO21
BUD27	PAN1
SNF1	LAC1
VPS13	VMA1
NTE1	PDB1
YLR297W	GET3
CTK1	SNF1
PET9	AAC1
SSA1	MYO5
INP51	PRP43
YCK1	MIG2
PHO4	CCT8
PUF6	ASH1
LYS4	HSP104
TPS3	SSA1
RSC3	HSP104
ERV25	ERP3
YCK1	YGR026W
YEL023C	URA1
YCK1	CYS4
YGR250C	YOR1
SLT2	SMI1
DPB4	IMD3
PET9	COX5a
PRP43	UTP10
CUE4	GET3
RNR3	CYS4
MIA40	KAP123
SNF1	ARV1
SRP1	ACS1
YCK1	MGA1
SPT23	OTU1
RPC34	SSA1
YCK1	OTU2
CYS4	KAR2
IES2	SSA3
LAT1	PDB1
YMR111C	SLX5
LYS9	SSA1
UTP10	UTP22
SRP1	YBR137W
YCK1	TOM71
SDA1	CCT8
RAT1	SSA1
RNR3	MAS2
ESS1	UTP22
YGR250C	CCT8
SOK2	CPR5
GPA2	YLR413W
NHP6b	RPC34
HTZ1	SAS3
KAP95	KAP123
YGR250C	ARG3
PHO4	TFA2
SRP1	RNQ1
SNF1	ERG5
SRP1	GLK1
YNG1	SAS3
SRP1	FUB1
SNF1	MSN2
SLT2	MPM1
ERG10	SSA1
YCK1	LYS1
SNF1	SEG1
HTZ1	SWC5
SET6	SSA1
CTK1	UTP22
PRP43	SSL1
YPL150W	NCL1
SLX5	SSK2
ANR2	SMI1
YCK1	AVT1
DSE4	GET3
EMW1	VMA1
NAT3	SSA1
ESA1	GLK1
TAZ1	SSA1
RPO21	RPB11
SAS3	NTO1
ERP6	ERV25
PRP43	IMD3
IES2	SWR1
RIM11	GLN3
KEX1	YLR413W
SNF1	JJJ1
YCK1	ELF1
PRP43	FPR3
SNO1	SNZ3
YCK1	MIA40
SRP1	HPA3
SNZ1	SNZ3
BUD27	SGS1
MET4	GLN3
PHO4	MYO5
SWR1	HTZ1
YCK1	YKR045C
YNL122C	KAP123
SRP1	GLN3
ADH2	YFL042C
MAS2	MAS1
PHO4	GUA1
SRP1	KAP123
DPH5	MAS2
SNO4	SNZ3
SPT2	SRP1
EMW1	KAP123
YGR250C	YML002W
VMA1	VMA13
SRP1	WWM1
EAF5	ESA1
RPC40	VMA1
YGL242C	MYO5
RNR3	MAS1
RRG7	YEL023C
SRP1	SNZ3
YCK1	STP3
HTZ1	KAP123
RPC40	DOP1
SRP1	BNA6
UTP10	SOF1
YCK1	LEU3
RTR1	RPB11
SRP1	PNC1
IMD3	IMD2
SRP1	HEM2
PRP43	RPC19
ESA1	YER134C
MYO5	YGR210C
ESS1	HSP104
YCK1	YML096W
SRP1	CSE1
RIM11	MGA1
INP51	FPR3
YME1	AFG3
ERV25	SEC11
YCK1	SUB1
PRP43	HTZ1
PRP43	RIO1
YPR174C	CHO1
IST1	XKS1
MET4	ZUO1
PRP43	TMA16
HTZ1	SWC4
YPR174C	KAP123
MYO5	YIL092W
YCK1	ADH2
VFA1	VPS4
RPA190	PRP43
PAN1	MYO5
KAP95	YNK1
ESA1	YGR001C
RPC40	YFL042C
SLT2	SKO1
SWC4	ESA1
CTK1	IMD3
MAS2	ATG2
YCK1	SKO1
YCK1	SRP1
RPC40	TRP5
YCK1	JJJ1
SRP1	IMD2
SLT2	SSK2
RPC40	PYC1
SSL1	KAP95
SSL1	IMD3
ESA1	OTU2
IME1	RIM11
SLT2	RCN2
YCK1	RIO1
EMW1	KAR2
SRP1	YJL218W
CBF1	MET4
YPL150W	AIM17
LYS9	KAR2
SRP1	YJR056C
STP3	NTE1
ELP3	IKI1
ELP4	IKI1
YCK1	OYE3
SLT2	MSF1
ERV25	SPC2
GDH1	CCT8
SRP1	YNK1
RIM11	CKI1
ERG5	ERG6
ERV25	ERG5
SRP1	PAP1
CTK1	HTZ1
MSN2	SOK2
SNA3	VMA13
ESA1	ELF1
SRP1	KAP95
YPL150W	YJR142W
SNZ1	SNO1
ESA1	HSP104
SRP1	CAT2
MIR1	GDB1
DID4	VPS4
SNO4	SNZ1
PSR2	RPA190
IST1	COG8
RIM11	TDA1
ERV25	HTZ1
RPC40	SRY1
HTZ1	FPR3
VPS4	HSP104
ESA1	FPR3
RPA190	FPR3
RPC19	RPC34
HDA1	HTZ1
MYO5	MET31
YMR027W	VMA13
YPL150W	YMR111C
SRP1	HSP10
RPA190	RPC19
ESA1	IES2
MET31	MET4
YPL150W	APJ1
COX5a	YPL216W
ESA1	ABZ1
RPC40	ADH2
ESA1	HTZ1
RPC19	RPC40
SRP1	YPR089W
ELP3	HTZ1
RPC40	RPC34
IST1	VPS4
ELP4	ELP3
TMA16	MSF1
ESA1	YPR089W
RPA190	RPC40
RIM20	VPS4
