# Supplementary material for: An integrative analysis of transcriptomic response of ethanol tolerant strains to ethanol in Saccharomyces cerevisiae
Source: Royal Society of Chemistry journal article supplement (doi:10.1039/c5mb00622h), 2015-11-26
Supplement: c5mb00622h1.zip [file ESI6.xlsx]

## Sheet: Sheet1
Table S6. Active subnetwork responsive to ethanol in yhl042wΔ/yhl042wΔ strain (N3)
Interactor A	Interactor B
ERP2	ERP1
SLA1	EDE1
PET9	COR1
MIS1	PIM1
DEP1	RXT3
YBL029C-A	HSP30
RFS1	GPX2
NHP6b	ISW1
YRO2	ATG22
PET9	COX9
SLA1	LDB17
SLX5	YRO2
TUP1	NHP6b
ERP2	HMO1
GIR2	RBG1
NRP1	YBL081W
HEM13	SSA3
MTC5	SSA3
NTH2	HSP42
SAS10	DUG2
PDB1	DOA4
ERP2	KAP123
ARL1	DOP1
VID24	HSP42
PET9	RIP1
SLC1	CCT4
SER3	BDH1
HEM13	PDI1
COR1	RIP1
TUP1	SOR2
MTC5	RNQ1
YDL121C	GET3
SLA1	KAP123
HMO1	ISW1
SLA1	WWM1
PET9	FMP10
SSA3	SSA4
CYM1	PDB1
SLA1	IOC3
SER3	CST26
ATG1	FRT2
SER3	CNS1
SLX5	NCB2
ERG25	ERP2
PMR1	PET9
SLA1	CHC1
CEG1	SSA3
LYS20	HMO1
NHP6b	IOC3
ATG1	YBL055C
LPD1	PDB1
YBR016W	PRP43
ATG1	ATG8
RAV2	VMA1
ERP1	ERG25
HEM13	HMO1
GET3	YHP1
DRS2	SMI1
ERP1	PHB1
GRX2	GET3
PMT7	SHR3
PIM1	PHB1
IOC3	ISW1
VMA16	ERP2
AFG3	GET3
SLC1	KAP123
ATG1	CNS1
CEG1	PDB1
YEL023C	VMA1
NHP6b	TFG2
YCK1	FRT2
GIS1	JIP4
YCK1	YAL037W
SLA1	BZZ1
PRP43	YCR016W
CYM1	HSP42
YCK1	SLA1
SWC4	SWC5
RAD6	RPN4
SER3	MAF1
RFS1	YOR1
YCK1	EDE1
ZUO1	MIS1
ATG1	SLX5
SER3	TMS1
YCK1	YBL055C
ATG1	RTK1
SLA1	INP51
YCK1	ATG8
ATG1	LHP1
ERP2	KAR2
ERP1	CBR1
MTC5	FMP10
GIS1	BUD27
DRS2	KAR2
ERP1	AYR1
HSP12	CPR1
PMT7	CHO1
YCK1	YBR090C
ATG1	SAS10
BUD27	CPR1
GPI8	CHO1
RTK1	UTP22
RTK1	NOP7
YCK1	CNS1
DRS2	INO1
STE12	ISW1
IOC3	HMO1
SLA1	SNA3
BZZ1	RNQ1
CYM1	LPD1
PRP43	HSP42
RTK1	TDA3
ERG25	SHR3
BUD27	JIP4
SDA1	CCT4
CPR1	HOS2
PET9	CYC1
PDI1	MNL1
YCK1	SLX5
YCK1	RTK1
YCK1	LHP1
SSA4	KAP123
AFG3	LPD1
CPR2	GET3
DEP1	ASH1
YEL023C	HXK1
ATG1	SVF1
YCK1	BUG1
COS6	SHR3
MAE1	URA7
BZZ1	LDB17
UTP22	HMO1
PDB1	AIM23
VMA16	SHR3
YCK1	SAS10
ATG1	GTT3
SLA1	VPS1
UTP22	BFR2
PRP43	NUG1
SLA1	GMH1
CAB3	SSA3
RBG1	SSA2
RTT102	HMO1
CHS7	SHR3
SLC1	AYR1
CEG1	SSA4
LYS4	ZUO1
IDP1	KAR2
HSP30	SNA3
MAF1	SCH9
MRK1	CCT3
SSA4	CHC1
SLA1	PER33
PET9	SDH2
CCT3	CCT4
SLA1	IOC2
ERG4	ERG26
ATG1	BUD27
SLC1	SNA3
NOP7	NUG1
GPI8	VMA16
CCT7	CCT4
ERG25	CHO1
ATG1	YFL034W
NHP6b	VPS1
BZZ1	CCC2
AFG3	PHB1
HMO1	EGD2
RFS1	SSA2
USB1	COR1
ATG1	ATG18
MPT5	HXK1
SSA2	HSP26
ATP2	ATP16
INO1	GET3
UTP5	STE12
SDA1	NUG1
YCK1	SVF1
DRS2	TCB3
PDR11	HMO1
CEG1	PRP43
CST6	HMO1
ISW1	VPS1
CNS1	HSP104
CCT3	DOP1
BUD27	ERG1
DOA4	URA2
YCK1	GTT3
SHR3	SOP4
VMA1	RAV1
DST1	TFG2
ERG26	ERG25
GPI8	SNL1
YBL029C-A	TCB3
ERP1	ERG5
JHD2	SAS10
ERG25	ERG4
ATG1	MIG2
DOA4	AVT1
ERG26	ERG1
MAE1	CCT4
ERG4	ERG1
HSP42	URA2
VMA1	ATP2
YCK1	YER079W
ATG1	YGR021W
PRP43	UTP22
PET9	AAC1
ASH1	RXT3
UGP1	SAS10
ISW1	IOC2
TFG2	KAP114
PMR1	PHB1
MAS1	ISW1
MAE1	VMA1
NTG1	IDH1
BZZ1	LPD1
RFS1	TCB3
SLA1	YMR253C
DEP1	PHO23
YCK1	BUD27
YCK1	HAC1
ATG18	TRM5
CPT1	ERP2
YCK1	YFL034W
RAV2	RAV1
SGD1	ISW1
BUD27	EGD2
NTE1	PDB1
YCK1	ATG18
SER33	SER3
ATG1	OTU2
HSP42	BAT2
LSB1	ACB1
PET9	COX5a
YCK2	FRT2
ATG1	TDA3
SLA1	INP52
ERG25	ERG1
ERP1	CPT1
NUG1	URA2
BZZ1	MPT5
RBG1	SSB2
SRP1	ACS1
YCK2	SLA1
YCK2	YBL010C
VPS13	VMA1
SDA1	NOP7
ATG1	TOM71
ISW1	IOC4
GPI8	LAC1
DEP1	RPD3
YCK1	MIG2
KAP123	URA2
HSP30	TCB3
XDJ1	VMA1
YLR297W	GET3
INP51	PRP43
HMO1	VPS1
KEX2	SLA1
YCK2	YBL055C
RPO41	KAR2
PSE1	PDB1
YCK1	YGR021W
YCK1	YGR026W
SSB2	SSA3
HSP42	SSA2
IES2	SSA3
YCK2	CST26
LAT1	PDB1
ATG1	YIL077C
ERP1	RPB11
TDA1	PDI1
LYS4	HSP104
CUE4	GET3
NMD5	SSA4
SRP1	HSP26
BZZ1	YOR1
PRP43	ALB1
YCK2	CNS1
ATG18	BNA1
YEL023C	URA1
RBG1	TMA46
SRP1	YBR137W
MIA40	CYC7
ERG25	SNL1
TUP1	HDA1
YNL155W	NPL4
YCK2	YBR225W
INP52	RNQ1
YCK1	OTU2
CNS1	SSB2
DUF1	EDE1
EMW1	HSP26
YCK1	TDA3
DPB4	IMD3
SLA1	INP53
YCK2	YBR285W
ERP1	SEY1
ATG18	HIR3
NHP6b	RPC34
MIA40	KAP123
CHC1	INO1
PIM1	IDH2
STI1	SSA3
SRP1	RNQ1
YCK1	TOM71
YCK2	ADP1
HMO1	TAF11
COX9	COX5a
SRP1	GLK1
DST1	NMD5
SLA1	HUA2
YCK1	OYE2
ERD1	ARV1
GAS3	SHR3
YCK1	GND1
DEP1	CTI6
ESA1	EDE1
ATG1	NPA3
RXT3	PHO23
PET9	FSF1
SKO1	TUP1
YCK2	SLX5
SSA2	SSA4
YLF2	CBR1
YPL264C	ERP2
CCT3	RTT102
UTP5	SGD1
YML131W	HMO1
YCK2	LHP1
PSE1	SOR2
BZZ1	PDR11
IOC4	HMO1
YCK1	DOT5
NOP7	SOP4
IOC3	VPS1
ESA1	PDX3
HTZ1	SWC5
HTZ1	ISW1
CHS7	SNL1
ISW1	ESC8
YCK1	YIL077C
TUP1	RPD3
SSA3	SSN3
ATG1	DGR2
AVT4	SHR3
UGP1	YGL242C
YCK2	SAS10
YCK1	LYS1
CEG1	VPS1
SLX5	SSK2
YCK2	PAR32
NHP6b	ISW2
YCK1	PRM10
ERG25	LAC1
MDH2	PDI1
YCK2	TRM8
ERP1	PIS1
RPD3	RXT3
GPI8	GAS3
KAP95	KAP123
ATG1	YKR041W
MAF1	RPC31
BZZ1	LCB3
ATG1	YKR045C
BZZ1	SNA3
CAB3	UTP22
UTP5	FAA4
CTK1	UTP22
KEL3	YRO2
YCK2	YDR109C
ISW2	ISW1
ESA1	GLK1
DSE4	GET3
KEX2	SHR3
YCK1	AVT1
ANR2	SMI1
YGL242C	BAS1
EMW1	VMA1
YCK2	GIR2
FPR1	HMO1
SSB2	DOP1
VPS4	YBL081W
MDH2	GET3
YCK2	ATC1
YCK1	NPA3
YCK2	VPS64
MAF1	RPC34
SRP1	HMO1
CYM1	LAT1
MUK1	RNQ1
GAS3	CHO1
ATG18	NTE1
CCT3	CCT7
YCK2	BFR2
YIR007W	URA2
ATG1	YLR257W
TAT2	SHR3
AYR1	SNA3
PRP43	IMD3
TUP1	SSN3
SMI1	BAS1
CPR1	RPD3
SNO1	SNZ3
BAT2	BAT1
YCK1	DGR2
ERG4	ERG5
CCC2	ATX1
YCK2	HEH2
CUE4	RAD6
YCK1	MIA40
AVT4	CHO1
BZZ1	GMH1
MRL1	ADP1
HTZ1	HMO1
LAC1	SNL1
CCT3	CCT5
SRP72	LHP1
YCK2	CYC7
HOS1	TUP1
GAS3	ERG4
YCK1	YKR041W
RXT3	CTI6
YCK1	YKR045C
SRP1	HPA3
YCK1	TRZ1
NOP7	KAP95
PRP43	ECM16
SMF3	VMA16
HEM13	CDC31
YCK2	YER079W
NOP7	NTE1
NUG1	JJJ1
LHP1	SRP54
BZZ1	PER33
SRP1	KAP123
CCT3	CAB3
BUD27	FPR1
ISW2	DPB4
SGD1	ZUO1
PRO3	ATX1
BZZ1	SEN2
ERG25	ERG5
SRP1	WWM1
YCK2	BUD27
MAE1	URA2
YCK1	USB1
ERG5	ERG1
DOP1	EGD1
EMW1	KAP123
YCK1	HAP1
YOR1	TCB3
UTP22	ECM16
SRP1	SNZ3
YCK1	YLR257W
ESA1	SVF1
ERG25	GAS3
TFG2	PSE1
PRP43	RPC19
YIR007W	HSP104
BZZ1	TDA5
BZZ1	YML002W
SRP1	PNC1
SHR3	PIS1
HTZ1	KAP123
RPD3	HAC1
SRP1	HEM2
INP52	CHC1
LYS4	CAM1
SSN3	BFR2
MIA40	CYC1
TMS1	PIS1
STI1	SSA4
YCK1	YML096W
IMD3	IMD2
VPS13	URA2
AVT4	ERG25
SWC4	EAF7
ESA1	PRO3
YCK1	SUB1
ATG1	JJJ1
CBR1	IMD3
KAP123	IDH2
YCK1	YMR102C
ERD1	YPL264C
RPB11	DST1
DID4	DID2
ISW2	SSA4
CBR1	TCB3
BZZ1	YMR253C
STE12	PSE1
PRP43	HTZ1
NOP7	SRP1
SRP1	LSB1
KAP95	URA2
CPT1	COS6
PCT1	SRP1
NOB1	PRP43
HTZ1	KAP114
GAS3	SNL1
YME1	AFG3
HTZ1	SWC4
YCK1	YPT53
TFG2	RPB11
IST1	XKS1
SSB2	ZUO1
SMI1	KEX2
ATG1	NOB1
PRP43	RIO1
CHC1	STI1
ATG1	RIO1
PRP43	TMA16
MUK1	SNZ3
INP53	CHC1
YCK2	BZZ1
YCK2	YCK1
YCK1	SKO1
MUK1	PNC1
GDH1	CEG1
YCK1	SRP1
DST1	SSN3
ESA1	YGR001C
AVT4	SNL1
FRA1	SSA2
SWC4	ESA1
FAA4	URA2
YCK1	JJJ1
KAP95	YNK1
ALB1	PSE1
SCH9	SKO1
VFA1	VPS4
PSE1	URA2
SRP1	IMD2
YCK2	SNL1
CTK1	IMD3
ATG1	CTI6
YCK2	YIL077C
SSA2	ATG26
CCT3	YNL155W
YCK2	CCT7
EAF7	MTC1
ESA1	OTU2
GAS3	LAC1
CCT3	VID27
ESA1	YLF2
BZZ1	YOR059C
SUA7	KAP114
YCK1	NOB1
CCT7	VID27
BZZ1	INP53
YPL264C	ERG25
MAE1	PSE1
YCK1	RIO1
PHB1	KEL3
TFG2	SUA7
EMW1	KAR2
RPC19	RPA12
YCK2	CYC1
YCK2	YJR056C
LYS9	KAR2
YCK2	RPA12
RPD3	MTC1
SRP1	YJR056C
SSN3	STE12
SSA2	ECM16
BZZ1	YOR389W
MUK1	UBA4
VID27	CCT5
IOC4	IOC2
IKS1	TRM13
ASH1	PHO23
EGD2	EGD1
YCK1	YPL071C
OGG1	KAP95
YLR326W	TCB3
BAT2	SSB2
YCK1	OYE3
SMF3	GAS3
YCK1	CTI6
FAA4	PSR2
OYE2	OYE3
EMW1	ATP2
SRP1	YNK1
ANR2	SSB2
URA2	STI1
CCT3	SEY1
FPR1	URA1
YCK1	CMR3
IDH2	URA2
YCK2	TRZ1
YPL264C	SNL1
RPD3	ASH1
KAP95	PSE1
DID2	IST1
RPD3	VPS1
NTE1	PSE1
CTK1	HTZ1
IKS1	CMR3
YCK2	ARV1
AYR1	PIS1
YCK2	YLR257W
MYO2	NMD5
YCK2	YLR326W
EAF7	KAP95
SRP1	KAP95
STI1	SSA2
HSP104	STI1
HTZ1	IOC2
YCK2	YML096W
OGG1	SRP1
TMA46	SSA2
ECM16	PHO23
POP3	KAP95
ATP2	ATP15
VPS1	ISW2
YPL264C	LAC1
MUK1	YKL151C
ESA1	HSP104
IST1	COG8
CDC31	VPS13
ASH1	CTI6
YCK2	TRI1
YCK2	TDA1
YCK2	YNL010W
HSP104	CAM1
DID4	VPS4
YCK2	YNL033W
PSE1	SRP1
CAB3	PIS1
CTI6	SSA2
YCK2	YNL034W
ESA1	YLR257W
YCK2	PHO23
YCK2	AVT4
CIN4	LYS9
RPC19	RPC31
ISW2	KAP95
YCK2	EAF7
YPT53	JJJ1
DID2	VPS4
YCK2	YNL155W
EAF7	SRP1
SSA2	CTF4
SSA2	TAZ1
VPS4	HSP104
MDH2	FAA4
RPD3	PHO23
HDA1	HTZ1
RPC19	RPC34
PSE1	HSP10
ESA1	YMR196W
RPC34	RPC31
POP3	SRP1
MUK1	SNO1
IDH2	IDH1
DUF1	SSB2
TCB3	PIS1
SRP1	HSP10
SUA7	SUB1
ERG5	PIS1
EAF7	ESA1
ESA1	IES2
CTI6	PHO23
SRP1	HUA2
YCK2	CTI6
ESA1	ABZ1
YCK2	YPL191C
ESA1	HTZ1
YCK2	CMR3
CTI6	RPD3
SRP1	YPR089W
IST1	VPS4
ESA1	YPR089W
SEY1	PIS1
ESA1	CTF4
ESA1	MET16
SRP54	SRP72
