# Supplementary material for: An integrative analysis of transcriptomic response of ethanol tolerant strains to ethanol in Saccharomyces cerevisiae
Source: Royal Society of Chemistry journal article supplement (doi:10.1039/c5mb00622h), 2015-11-26
Supplement: c5mb00622h1.zip [file ESI7.xlsx]

## Sheet: Sheet1
Table S7. Significantly enriched GO biological process terms of N1
GO Term	Aspect	P-value	Sample frequency	Background frequency	Genes
GO:0055114 oxidation-reduction process	P	1.3e-12	59/275 (21.5%)	437/6379 (6.9%)	SVL3 IMD2 GRX2 ERV1 GDH2 RNR3 COX6 CCP1 HAP4 IMD3 COR1 PET9 SUR2 TDA3 JHD2 GDH1 ERG26 AAC1 MIA40 RNR4 HAP1OYE3 GPX2 IDP1 ERG5 YIR035C URA1 CIR2 RNR1 AAD4 SCS7 GRX7 ERG11 SDH4 DLD1 COX5A YML131W ILV5 IDH2 LYS9 CIT2ERG25 MDH1 UGA2 QCR2 CYT1 CYC7 NDE1 HAP3 RFS1 MET16 LYS1 COX9 SDH2 MAE1 ADH3 YMR226C IDP3 GRX4
GO:0061393 positive regulation of transcription from RNA polymerase II promoter in response to osmotic stress	P	4.76e-06	7/275 (2.5%)	8/6379 (0.1%)	HOT1 CRZ1 MSN4 HOG1 MSN2 SMP1 SKO1
GO:0061392 regulation of transcription from RNA polymerase II promoter in response to osmotic stress	P	2.06e-05	7/275 (2.5%)	9/6379 (0.1%)	HOT1 CRZ1 MSN4 HOG1 MSN2 SMP1 SKO1
GO:0045333 cellular respiration	P	2.43e-05	20/275 (7.3%)	103/6379 (1.6%)	COX6 HAP4 COR1 PET9 AAC1 HAP1 IDP1 SDH4 DLD1 COX5A IDH2 CIT2 MDH1 QCR2 CYT1 CYC7 HAP3 COX9 SDH2 IDP3
GO:0015980 energy derivation by oxidation of organic compounds	P	0.00109	22/275 (8.0%)	152/6379 (2.4%)	COX6 HAP4 COR1 PET9 AAC1 HAP1 IDP1 SDH4 DLD1 COX5A IDH2 CIT2 MDH1 QCR2 CYT1 CYC7 NDE1 HAP3 COX9 SDH2 ADH3IDP3
GO:0070972 protein localization to endoplasmic reticulum	P	0.00218	12/275 (4.4%)	50/6379 (0.8%)	SSA3 EMP24 EGD2 ERP2 SEC11 KAR2 SRP72 SRP14 ERD1 GET3 SRP54 SRP21
GO:1901564 organonitrogen compound metabolic process	P	0.00869	53/275 (19.3%)	657/6379 (10.3%)	SKT5 IMD2 GRX2 GDH2 ELO3 COX6 CAB3 APE2 CRZ1 VMA1 SNZ3 YML096W IMD3 KAP95 YKL151C SUR2 GDH1 SEC11 AAC1 PHO2IDP1 LEU3 GLK1 LAC1 URA1 DUG2 SCS7 SDH4 BUD32 GUA1 COX5A ILV5 CRH1 IDH2 CHO1 LYS9 CIT2 UGA2 CHO2 QCR2 NTE1CHS7 CYT1 ABZ1 CYC7 NDE1 MET16 LYS1 COX9 SDH2 MAE1 ADH3 IDP3
GO:0006091 generation of precursor metabolites and energy	P	0.0099	23/275 (8.4%)	186/6379 (2.9%)	COX6 HAP4 COR1 PET9 AAC1 HAP1 IDP1 GLK1 SDH4 DLD1 COX5A IDH2 CIT2 MDH1 QCR2 CYT1 CYC7 NDE1 HAP3 COX9 SDH2ADH3 IDP3
