# Supplementary material for: An integrative analysis of transcriptomic response of ethanol tolerant strains to ethanol in Saccharomyces cerevisiae
Source: Royal Society of Chemistry journal article supplement (doi:10.1039/c5mb00622h), 2015-11-26
Supplement: c5mb00622h1.zip [file ESI8.xlsx]

## Sheet: Sheet1
Table S8. Significantly enriched GO biological process terms of N2
GO Term	Aspect	P-value	Sample frequency	Background frequency	Genes
GO:1901362 organic cyclic compound biosynthetic process	P	0.000229	77/252 (30.6%)	1102/6379 (17.3%)	MET31 MIG3 ERG6 ESS1 IMD2 YNK1 ELP3 RPA190 RPC40 CTK1 RNR3 MET4 SOK2 NRG1 SWC5 GUA1 ASH1 DPB4 SNZ3 RPB11 MIG2 TRP5 IMD3MSN2 SPT23 HPC2 RPC19 ERG10 ATG26 MGA1 YPL216W IKI1 SAS3 OTU1 EAF5 NTO1 CBF1 IES2 HDA1 PNC1 AAC1 NHP6B UTP10 ELF1 RSC3 YRB2ABZ1 CDC36 SUB1 TFA2 HEM2 SMI1 NCB2 RPC34 RPO21 HTZ1 SNZ1 ERG5 LEU3 MSN4 ESA1 PHO4 ELP4 RTR1 SNO1 URA1 YNG1 SPT2 SWR1 BNA6SLX5 SWC4 SKO1 GLN3 RAT1 SSL1 IME1
GO:0044271 cellular nitrogen compound biosynthetic process	P	0.000296	75/252 (29.8%)	1068/6379 (16.7%)	MET31 MIG3 ESS1 IMD2 YNK1 ELP3 RPA190 RPC40 CTK1 RNR3 MET4 SOK2 NRG1 SWC5 GUA1 ASH1 DPB4 SNZ3 RPB11 MIG2 TRP5 YML096W IMD3MSN2 SPT23 HPC2 RPC19 MGA1 YPL216W IKI1 SAS3 OTU1 EAF5 NTO1 CBF1 IES2 HDA1 PNC1 AAC1 NHP6B UTP10 ELF1 RSC3 YRB2 ABZ1 CDC36SUB1 TFA2 HEM2 SMI1 NCB2 RPC34 RPO21 HTZ1 SNZ1 LEU3 MSN4 ESA1 PHO4 ELP4 LAC1 RTR1 SNO1 URA1 YNG1 SPT2 SWR1 BNA6 SLX5 SWC4SKO1 GLN3 RAT1 SSL1 IME1
GO:0016568chromatin modification	P	0.000444	28/252 (11.1%)	239/6379 (3.7%)	ESS1 ELP3 ACS1 SWC5 FPR3 ASH1 DPB4 MSN2 HPC2 YPL216W SAS3 EAF5 NTO1 CBF1 IES2 HDA1 NHP6B ELF1 RSC3 YRB2 FUB1 HTZ1 MSN4 ESA1PHO4 YNG1 SWR1 SWC4
GO:0019438 aromatic compound biosynthetic process	P	0.000445	73/252 (29.0%)	1038/6379 (16.3%)	MET31 MIG3 ESS1 IMD2 YNK1 ELP3 RPA190 RPC40 CTK1 RNR3 MET4 SOK2 NRG1 SWC5 GUA1 ASH1 DPB4 SNZ3 RPB11 MIG2 TRP5 IMD3 MSN2SPT23 HPC2 RPC19 MGA1 YPL216W IKI1 SAS3 OTU1 EAF5 NTO1 CBF1 IES2 HDA1 PNC1 AAC1 NHP6B UTP10 ELF1 RSC3 YRB2 ABZ1 CDC36 SUB1TFA2 HEM2 SMI1 NCB2 RPC34 RPO21 HTZ1 SNZ1 LEU3 MSN4 ESA1 PHO4 ELP4 RTR1 SNO1 URA1 YNG1 SPT2 SWR1 BNA6 SLX5 SWC4 SKO1 GLN3RAT1 SSL1 IME1
GO:0006351transcription, DNA-templated	P	0.00047	59/252 (23.4%)	766/6379 (12.0%)	MET31 MIG3 ESS1 ELP3 RPA190 RPC40 CTK1 MET4 SOK2 NRG1 SWC5 ASH1 DPB4 RPB11 MIG2 MSN2 SPT23 HPC2 RPC19 MGA1 YPL216W IKI1SAS3 OTU1 EAF5 NTO1 CBF1 IES2 HDA1 PNC1 NHP6B UTP10 ELF1 RSC3 YRB2 CDC36 SUB1 TFA2 SMI1 NCB2 RPC34 RPO21 HTZ1 LEU3 MSN4 ESA1PHO4 ELP4 RTR1 YNG1 SPT2 SWR1 SLX5 SWC4 SKO1 GLN3 RAT1 SSL1 IME1
GO:0097659 nucleic acid-templated transcription	P	0.000492	59/252 (23.4%)	767/6379 (12.0%)	MET31 MIG3 ESS1 ELP3 RPA190 RPC40 CTK1 MET4 SOK2 NRG1 SWC5 ASH1 DPB4 RPB11 MIG2 MSN2 SPT23 HPC2 RPC19 MGA1 YPL216W IKI1SAS3 OTU1 EAF5 NTO1 CBF1 IES2 HDA1 PNC1 NHP6B UTP10 ELF1 RSC3 YRB2 CDC36 SUB1 TFA2 SMI1 NCB2 RPC34 RPO21 HTZ1 LEU3 MSN4 ESA1PHO4 ELP4 RTR1 YNG1 SPT2 SWR1 SLX5 SWC4 SKO1 GLN3 RAT1 SSL1 IME1
GO:0032774 RNA biosynthetic process	P	0.000618	59/252 (23.4%)	772/6379 (12.1%)	MET31 MIG3 ESS1 ELP3 RPA190 RPC40 CTK1 MET4 SOK2 NRG1 SWC5 ASH1 DPB4 RPB11 MIG2 MSN2 SPT23 HPC2 RPC19 MGA1 YPL216W IKI1SAS3 OTU1 EAF5 NTO1 CBF1 IES2 HDA1 PNC1 NHP6B UTP10 ELF1 RSC3 YRB2 CDC36 SUB1 TFA2 SMI1 NCB2 RPC34 RPO21 HTZ1 LEU3 MSN4 ESA1PHO4 ELP4 RTR1 YNG1 SPT2 SWR1 SLX5 SWC4 SKO1 GLN3 RAT1 SSL1 IME1
GO:0018130heterocycle biosynthetic process	P	0.000971	73/252 (29.0%)	1058/6379 (16.6%)	MET31 MIG3 ESS1 IMD2 YNK1 ELP3 RPA190 RPC40 CTK1 RNR3 MET4 SOK2 NRG1 SWC5 GUA1 ASH1 DPB4 SNZ3 RPB11 MIG2 TRP5 IMD3 MSN2SPT23 HPC2 RPC19 MGA1 YPL216W IKI1 SAS3 OTU1 EAF5 NTO1 CBF1 IES2 HDA1 PNC1 AAC1 NHP6B UTP10 ELF1 RSC3 YRB2 ABZ1 CDC36 SUB1TFA2 HEM2 SMI1 NCB2 RPC34 RPO21 HTZ1 SNZ1 LEU3 MSN4 ESA1 PHO4 ELP4 RTR1 SNO1 URA1 YNG1 SPT2 SWR1 BNA6 SLX5 SWC4 SKO1 GLN3RAT1 SSL1 IME1
GO:0006325chromatin organization	P	0.00314	29/252 (11.5%)	278/6379 (4.4%)	ESS1 ELP3 ACS1 SWC5 FPR3 ASH1 DPB4 MSN2 HPC2 YPL216W SAS3 EAF5 NTO1 CBF1 IES2 HDA1 NHP6B ELF1 RSC3 YRB2 FUB1 HTZ1 MSN4 ESA1PHO4 YNG1 SPT2 SWR1 SWC4
GO:0006355regulation of transcription, DNA-templated	P	0.00546	53/252 (21.0%)	707/6379 (11.1%)	MET31 MIG3 ESS1 ELP3 CTK1 MET4 SOK2 NRG1 SWC5 ASH1 DPB4 MIG2 MSN2 SPT23 HPC2 MGA1 YPL216W IKI1 SAS3 OTU1 EAF5 NTO1 CBF1IES2 HDA1 PNC1 NHP6B UTP10 ELF1 RSC3 YRB2 CDC36 SUB1 TFA2 SMI1 NCB2 HTZ1 LEU3 MSN4 ESA1 PHO4 ELP4 RTR1 YNG1 SPT2 SWR1 SLX5SWC4 SKO1 GLN3 RAT1 SSL1 IME1
GO:2001141regulation of RNA biosynthetic process	P	0.0057	53/252 (21.0%)	708/6379 (11.1%)	MET31 MIG3 ESS1 ELP3 CTK1 MET4 SOK2 NRG1 SWC5 ASH1 DPB4 MIG2 MSN2 SPT23 HPC2 MGA1 YPL216W IKI1 SAS3 OTU1 EAF5 NTO1 CBF1IES2 HDA1 PNC1 NHP6B UTP10 ELF1 RSC3 YRB2 CDC36 SUB1 TFA2 SMI1 NCB2 HTZ1 LEU3 MSN4 ESA1 PHO4 ELP4 RTR1 YNG1 SPT2 SWR1 SLX5SWC4 SKO1 GLN3 RAT1 SSL1 IME1
GO:1903506regulation of nucleic acid-templated transcription	P	0.0057	53/252 (21.0%)	708/6379 (11.1%)	MET31 MIG3 ESS1 ELP3 CTK1 MET4 SOK2 NRG1 SWC5 ASH1 DPB4 MIG2 MSN2 SPT23 HPC2 MGA1 YPL216W IKI1 SAS3 OTU1 EAF5 NTO1 CBF1IES2 HDA1 PNC1 NHP6B UTP10 ELF1 RSC3 YRB2 CDC36 SUB1 TFA2 SMI1 NCB2 HTZ1 LEU3 MSN4 ESA1 PHO4 ELP4 RTR1 YNG1 SPT2 SWR1 SLX5SWC4 SKO1 GLN3 RAT1 SSL1 IME1
GO:0034654nucleobase-containing compound biosynthetic process	P	0.00703	66/252 (26.2%)	969/6379 (15.2%)	MET31 MIG3 ESS1 IMD2 YNK1 ELP3 RPA190 RPC40 CTK1 RNR3 MET4 SOK2 NRG1 SWC5 GUA1 ASH1 DPB4 RPB11 MIG2 IMD3 MSN2 SPT23 HPC2RPC19 MGA1 YPL216W IKI1 SAS3 OTU1 EAF5 NTO1 CBF1 IES2 HDA1 PNC1 NHP6B UTP10 ELF1 RSC3 YRB2 CDC36 SUB1 TFA2 SMI1 NCB2 RPC34RPO21 HTZ1 LEU3 MSN4 ESA1 PHO4 ELP4 RTR1 URA1 YNG1 SPT2 SWR1 BNA6 SLX5 SWC4 SKO1 GLN3 RAT1 SSL1 IME1
