# Supplementary material for: An integrative analysis of transcriptomic response of ethanol tolerant strains to ethanol in Saccharomyces cerevisiae
Source: Royal Society of Chemistry journal article supplement (doi:10.1039/c5mb00622h), 2015-11-26
Supplement: c5mb00622h1.zip [file ESI9.xlsx]

## Sheet: Sheet1
Table S9. Significantly enriched GO biological process terms of N3
GO Term	Aspect	P-value	Sample frequency	Background frequency	Genes
GO:0006457 protein folding	P	7.43e-09	29/374 (7.8%)	110/6379 (1.7%)	CPR2 CNS1 SSA3 HSP26 FPR1 CIN4 CPR1 EGD2 CCT3 MIA40 SSA4 CCT4 HSP10 STI1 CCT7 YME1 SNL1 PHB1 PDI1 SHR3 GET3 SSB2 CCT5 EGD1ZUO1 CHS7 SSA2 XDJ1 HSP104
GO:0055114oxidation-reduction process	P	8.4e-05	55/374 (14.7%)	437/6379 (6.9%)	IMD2 GRX2 RIP1 CBR1 LPD1 ERG1 IMD3 COR1 ERG4 BNA1 PET9 TDA3 JHD2 GDH1 ERG26 AAC1 MIA40 HEM13 HAP1 OYE3 GPX2 PDX3 IDP1 CYC1ERG5 MIS1 URA1 SOR2 UGP1 OYE2 IDH1 ACS1 MDH2 GND1 SER33 COX5A YML131W DOT5 IDH2 LYS9 ERG25 TAZ1 TDA5 CYC7 SER3 PDB1 RFS1MET16 LYS1 BDH1 COX9 SDH2 MAE1 AYR1 PRO3
GO:0015031 protein transport	P	0.000454	64/374 (17.1%)	570/6379 (8.9%)	KAP123 VFA1 RAV2 KAP114 SSA3 DOP1 VPS1 CPR1 EGD2 MTC5 KAP95 ERP2 YBR137W ATG18 VID24 INP52 ATG1 MIA40 KAR2 BFR2 SSA4 COG8DRS2 HSP10 INP51 SRP72 MRL1 SRP1 VPS4 YME1 NMD5 SHR3 VPS13 MDH2 ATG8 PER33 MAS1 ERD1 YPT53 GET3 SRP54 SOP4 NPL4 RAV1 DID4EGD1 ATG26 CDC31 TOM71 ERP1 CHS7 SSA2 XDJ1 PSE1 CHC1 MYO2 VPS64 BUG1 ARL1 IST1 DID2 INP53 NUG1 SDA1
GO:0045184establishment of protein localization	P	0.000997	65/374 (17.4%)	595/6379 (9.3%)	KAP123 VFA1 RAV2 KAP114 SSA3 DOP1 VPS1 CPR1 EGD2 MTC5 KAP95 ERP2 YBR137W ATG18 VID24 INP52 ATG1 MIA40 KAR2 BFR2 SSA4 COG8HAP1 DRS2 HSP10 INP51 SRP72 MRL1 SRP1 VPS4 YME1 NMD5 SHR3 VPS13 MDH2 ATG8 PER33 MAS1 ERD1 YPT53 GET3 SRP54 SOP4 NPL4 RAV1DID4 EGD1 ATG26 CDC31 TOM71 ERP1 CHS7 SSA2 XDJ1 PSE1 CHC1 MYO2 VPS64 BUG1 ARL1 IST1 DID2 INP53 NUG1 SDA1
GO:0033365 protein localization to organelle	P	0.00247	44/374 (11.8%)	350/6379 (5.5%)	KAP123 KAP114 SSA3 VPS1 EGD2 KAP95 ERP2 YBR137W ATG18 VID24 ATG1 MIA40 KAR2 SSA4 COG8 HAP1 HSP10 SRP72 SRP1 VPS4 YME1 NMD5RPD3 VPS13 MDH2 ATG8 MAS1 ERD1 YPT53 GET3 SRP54 NPL4 DID4 EGD1 TOM71 ERP1 SSA2 MUK1 XDJ1 PSE1 NPA3 VPS64 ARL1 DID2
GO:1901566organonitrogen compound biosynthetic process	P	0.00375	47/374 (12.6%)	391/6379 (6.1%)	IMD2 YNK1 BAT1 CPT1 URA2 FPR1 LYS4 CAB3 LPD1 SNZ3 SCH9 YML096W IMD3 BAT2 ARV1 BNA1 KAP95 ATP2 GDH1 AAC1 HEM2 HEM13 PDX3 IDP1LAC1 MIS1 SNO1 URA1 DEP1 ATP16 PCT1 IDH1 ATP15 SER33 IDH2 CHO1 LYS9 CHS7 PNC1 URA7 ABZ1 LYS20 SER3 MET16 LYS1 LCB3 PRO3
GO:0008104 protein localization	P	0.00504	72/374 (19.3%)	715/6379 (11.2%)	KAP123 VFA1 RAV2 KAP114 SSA3 DOP1 VPS1 CPR1 SCH9 EGD2 MTC5 KAP95 ERP2 YBR137W ATG18 VID24 INP52 ATG1 MIA40 KAR2 BFR2 SSA4COG8 HAP1 DRS2 HSP10 INP51 SRP72 MRL1 STI1 SRP1 VPS4 YME1 NMD5 RPD3 SHR3 VPS13 MDH2 ATG8 PER33 MAS1 ERD1 YPT53 GET3 SRP54SOP4 NPL4 RAV1 DID4 EGD1 ATG26 CDC31 TOM71 ERP1 CHS7 HDA1 SSA2 MUK1 XDJ1 PSE1 NPA3 CHC1 MYO2 VPS64 BUG1 ARL1 IST1 DID2HSP104 INP53 NUG1 SDA1
GO:0009199ribonucleoside triphosphate metabolic process	P	0.0054	15/374 (4.0%)	62/6379 (1.0%)	IMD2 YNK1 RIP1 VMA1 IMD3 ATP2 CYC1 ATP16 ATP15 COX5A TAZ1 URA7 CYC7 COX9 SDH2
