# Supplementary material for: An integrative analysis of transcriptomic response of ethanol tolerant strains to ethanol in Saccharomyces cerevisiae
Source: Royal Society of Chemistry journal article supplement (doi:10.1039/c5mb00622h), 2015-11-26
Supplement: c5mb00622h1.zip [file ESI10.docx]

| Table S10. N1 clusters and their significantly enriched GO biological process terms | | |
| --- | --- | --- |
| **Clusters** | | **Enriched GO Biological Processes (*p*-value < 0.01)** |
| **1** | **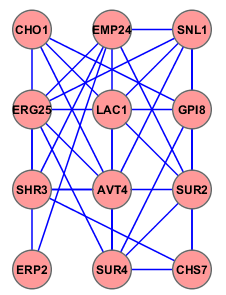** | | lipid biosynthetic process | | --- | | membrane lipid biosynthetic process | | cellular lipid metabolic process | | membrane lipid metabolic process | | lipid metabolic process | | Golgi vesicle transport | | ER to Golgi vesicle-mediated transport | | sphingolipid biosynthetic process | | fatty acid biosynthetic process | |
| **2** | **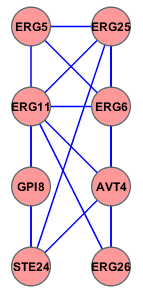** | | cellular alcohol biosynthetic process | | --- | | ergosterol biosynthetic process | | cellular lipid biosynthetic process | | phytosteroid biosynthetic process | | ergosterol metabolic process | | phytosteroid metabolic process | | cellular alcohol metabolic process | | sterol biosynthetic process | | steroid biosynthetic process | | steroid metabolic process | | sterol metabolic process | | alcohol biosynthetic process | | lipid biosynthetic process | | organic hydroxy compound biosynthetic process | | alcohol metabolic process | | cellular lipid metabolic process | | organic hydroxy compound metabolic process | | lipid metabolic process | | small molecule biosynthetic process | |
| **3** | **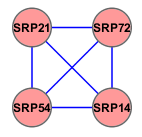** | | SRP-dependent cotranslational protein targeting to membrane, signal sequence recognition | | --- | | SRP-dependent cotranslational protein targeting to membrane | | cotranslational protein targeting to membrane | | protein targeting to ER | | establishment of protein localization to endoplasmic reticulum | | protein localization to endoplasmic reticulum | | protein targeting to membrane | | establishment of protein localization to membrane | | protein localization to membrane | | cellular protein complex assembly | | protein targeting | | establishment of protein localization to organelle | | single-organism membrane organization | | membrane organization | | protein complex assembly | | protein complex biogenesis | | protein localization to organelle | | intracellular protein transport | | single-organism cellular localization | | cellular macromolecular complex assembly | | protein complex subunit organization | | cellular protein localization | | cellular macromolecule localization | | cytoplasmic transport | | macromolecular complex assembly | | protein transport | |
| **4** | **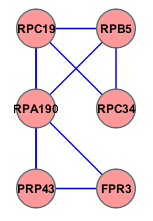** | | ncRNA transcription | | --- | | tRNA transcription from RNA polymerase III promoter | | tRNA transcription | | transcription from RNA polymerase III promoter | | transcription from RNA polymerase I promoter | | ncRNA metabolic process | |
| **5** | **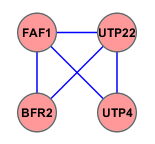** | | maturation of SSU-rRNA from tricistronic rRNA transcript (SSU-rRNA, 5.8S rRNA, LSU-rRNA) | | --- | | maturation of SSU-rRNA | | ribosomal small subunit biogenesis | | rRNA processing | | rRNA metabolic process | | ribosome biogenesis | | ncRNA processing | | ribonucleoprotein complex biogenesis | | ncRNA metabolic process | |
| **6** | **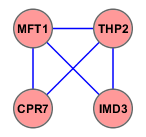** |  |
| **7** | **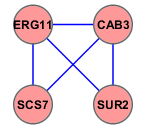** |  |
| **8** | **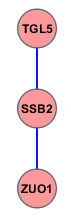** | | translational frameshifting | | --- | | regulation of translational fidelity | |
| **9** | **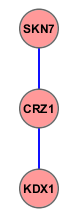** |  |
| **10** | **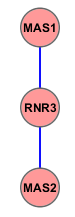** | | protein processing involved in protein targeting to mitochondrion | | --- | | mitochondrial protein processing | |
| **11** | **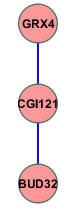** |  |
| **12** | **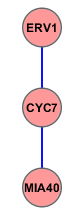** | protein import into mitochondrial intermembrane space |
| **13** | **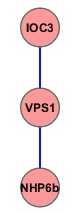** |  |
| **14** | **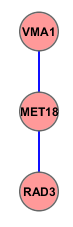** |  |
| **15** | **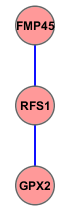** |  |
