# Supplementary material for: An integrative analysis of transcriptomic response of ethanol tolerant strains to ethanol in Saccharomyces cerevisiae
Source: Royal Society of Chemistry journal article supplement (doi:10.1039/c5mb00622h), 2015-11-26
Supplement: c5mb00622h1.zip [file ESI11.docx]

| Table S11. N2 clusters and their significantly enriched GO biological process terms | | |
| --- | --- | --- |
| **Clusters** | | **Enriched GO Biological Processes (*p*-value < 0.01)** |
| **1** | **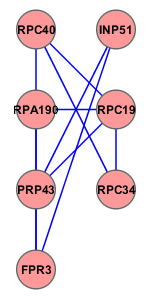** | | ncRNA transcription | | --- | | tRNA transcription from RNA polymerase III promoter | | tRNA transcription | | transcription from RNA polymerase III promoter | | transcription from RNA polymerase I promoter | |
| **2** | **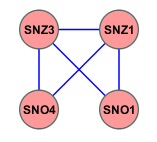** | | pyridoxine metabolic process | | --- | | pyridoxine biosynthetic process | | vitamin B6 biosynthetic process | | vitamin B6 metabolic process | | pyridoxal phosphate metabolic process | | pyridoxal phosphate biosynthetic process | | aldehyde biosynthetic process | | pyridine-containing compound biosynthetic process | | vitamin biosynthetic process | | water-soluble vitamin biosynthetic process | | cellular aldehyde metabolic process | | vitamin metabolic process | | water-soluble vitamin metabolic process | | organic hydroxy compound biosynthetic process | | coenzyme biosynthetic process | | pyridine-containing compound metabolic process | | cofactor biosynthetic process | | organic hydroxy compound metabolic process | |
| **3** | **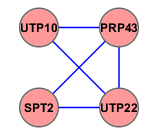** | | maturation of SSU-rRNA from tricistronic rRNA transcript (SSU-rRNA, 5.8S rRNA, LSU-rRNA) | | --- | | maturation of SSU-rRNA | | ribosomal small subunit biogenesis | |
| **4** | **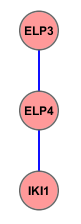** | | tRNA modification | | --- | | tRNA processing | | RNA modification | | tRNA metabolic process | | tRNA wobble uridine modification | | tRNA wobble base modification | |
| **5** | **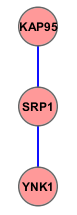** |  |
| **6** | **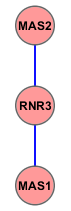** | | protein processing involved in protein targeting to mitochondrion | | --- | | mitochondrial protein processing | |
| **7** | **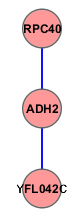** |  |
| **8** | **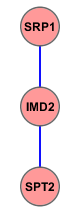** |  |
| **9** | **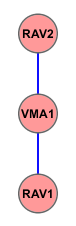** | | vacuolar acidification | | --- | | pH reduction | | intracellular pH reduction | | regulation of cellular pH | | regulation of intracellular pH | | regulation of pH | | cellular monovalent inorganic cation homeostasis | | monovalent inorganic cation homeostasis | | cellular cation homeostasis | | cellular ion homeostasis | | inorganic ion homeostasis | | cation homeostasis | | cellular chemical homeostasis | | ion homeostasis | | chemical homeostasis | | cellular homeostasis | |
| **10** | **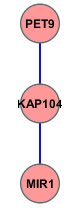** |  |
| **11** | **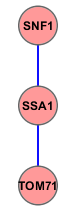** |  |
| **12** | **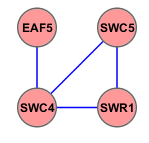** | | histone exchange | | --- | | ATP-dependent chromatin remodeling | | chromatin modification | | chromatin organization | | nucleosome organization | | chromatin remodeling | | chromosome organization | | protein-DNA complex subunit organization | |
