# Supplementary material for: An integrative analysis of transcriptomic response of ethanol tolerant strains to ethanol in Saccharomyces cerevisiae
Source: Royal Society of Chemistry journal article supplement (doi:10.1039/c5mb00622h), 2015-11-26
Supplement: c5mb00622h1.zip [file ESI13.xlsx]

## Sheet: Sheet1
Table S13. Yeast regulatory network
TFs	Genes
Abf1p	AAC1
Abf1p	AAT1
Abf1p	AAT2
Abf1p	ABP140
Abf1p	ACB1
Abf1p	ACC1
Abf1p	ACH1
Abf1p	ACP1
Abf1p	ACS1
Abf1p	ACS2
Abf1p	ACT1
Abf1p	ADE3
Abf1p	ADE5,7
Abf1p	ADE8
Abf1p	ADH1
Abf1p	ADH3
Abf1p	ADH4
Abf1p	ADH5
Abf1p	ADR1
Abf1p	AFG3
Abf1p	AFI1
Abf1p	AGE1
Abf1p	AGP2
Abf1p	AHC2
Abf1p	AIM18
Abf1p	AIM34
Abf1p	AIM46
Abf1p	AIM5
Abf1p	AIP1
Abf1p	AKR1
Abf1p	ALD2
Abf1p	ALD5
Abf1p	ALF1
Abf1p	ALG1
Abf1p	ALG11
Abf1p	ALP1
Abf1p	ALR2
Abf1p	AME1
Abf1p	ANP1
Abf1p	ANT1
Abf1p	APE3
Abf1p	API2
Abf1p	APJ1
Abf1p	APL1
Abf1p	APL2
Abf1p	APL3
Abf1p	APN2
Abf1p	APT2
Abf1p	ARB1
Abf1p	ARC15
Abf1p	ARC35
Abf1p	ARF2
Abf1p	ARG1
Abf1p	ARG2
Abf1p	ARG4
Abf1p	ARG5,6
Abf1p	ARG7
Abf1p	ARG8
Abf1p	ARG82
Abf1p	ARH1
Abf1p	ARN1
Abf1p	ARO3
Abf1p	ARO9
Abf1p	ARP5
Abf1p	ARP7
Abf1p	ARP8
Abf1p	ARP9
Abf1p	ARR1
Abf1p	ASE1
Abf1p	ASF1
Abf1p	ASF2
Abf1p	ASH1
Abf1p	ASN2
Abf1p	ASP1
Abf1p	ATC1
Abf1p	ATG15
Abf1p	ATG33
Abf1p	ATG36
Abf1p	ATO2
Abf1p	ATO3
Abf1p	ATP15
Abf1p	ATP17
Abf1p	ATP23
Abf1p	ATP7
Abf1p	AUR1
Abf1p	AUS1
Abf1p	AVL9
Abf1p	AXL2
Abf1p	AYR1
Abf1p	BAP3
Abf1p	BAT2
Abf1p	BBC1
Abf1p	BCP1
Abf1p	BCS1
Abf1p	BDF1
Abf1p	BDF2
Abf1p	BDH1
Abf1p	BDH2
Abf1p	BEM4
Abf1p	BET1
Abf1p	BET2
Abf1p	BET3
Abf1p	BGL2
Abf1p	BIG1
Abf1p	BIO2
Abf1p	BIR1
Abf1p	BIT61
Abf1p	BMH2
Abf1p	BNA1
Abf1p	BNA2
Abf1p	BNA5
Abf1p	BNI4
Abf1p	BRE1
Abf1p	BRR2
Abf1p	BRX1
Abf1p	BSC2
Abf1p	BSD2
Abf1p	BSP1
Abf1p	BUB1
Abf1p	BUD21
Abf1p	BUD27
Abf1p	BUD3
Abf1p	BUD4
Abf1p	BUD8
Abf1p	BUR2
Abf1p	BUR6
Abf1p	BYE1
Abf1p	CAC2
Abf1p	CAD1
Abf1p	CAF120
Abf1p	CAF40
Abf1p	CAP1
Abf1p	CAP2
Abf1p	CAR1
Abf1p	CAT8
Abf1p	CAX4
Abf1p	CBF5
Abf1p	CBP4
Abf1p	CCT2
Abf1p	CCT4
Abf1p	CCT6
Abf1p	CCT7
Abf1p	CCT8
Abf1p	CCW12
Abf1p	CCW14
Abf1p	CDC16
Abf1p	CDC19
Abf1p	CDC20
Abf1p	CDC24
Abf1p	CDC26
Abf1p	CDC34
Abf1p	CDC39
Abf1p	CDC42
Abf1p	CDC48
Abf1p	CDC5
Abf1p	CDC55
Abf1p	CDC60
Abf1p	CDC7
Abf1p	CDS1
Abf1p	CET1
Abf1p	CFD1
Abf1p	CFT2
Abf1p	CHA1
Abf1p	CHD1
Abf1p	CHO2
Abf1p	CHS1
Abf1p	CHS5
Abf1p	CIA1
Abf1p	CIC1
Abf1p	CIK1
Abf1p	CIN1
Abf1p	CIN2
Abf1p	CIN4
Abf1p	CIT1
Abf1p	CIT3
Abf1p	CKA1
Abf1p	CKA2
Abf1p	CLA4
Abf1p	CLF1
Abf1p	CLN1
Abf1p	CMD1
Abf1p	CMR3
Abf1p	CMS1
Abf1p	CNB1
Abf1p	COG4
Abf1p	COG6
Abf1p	COP1
Abf1p	COQ6
Abf1p	COS1
Abf1p	COS10
Abf1p	COS3
Abf1p	COS4
Abf1p	COS5
Abf1p	COS6
Abf1p	COS8
Abf1p	COX16
Abf1p	COX23
Abf1p	COX5a
Abf1p	COX6
Abf1p	CPA1
Abf1p	CPR1
Abf1p	CPR5
Abf1p	CRH1
Abf1p	CRZ1
Abf1p	CSH1
Abf1p	CSL4
Abf1p	CSM4
Abf1p	CSR1
Abf1p	CST6
Abf1p	CTA1
Abf1p	CTF13
Abf1p	CTF18
Abf1p	CTF4
Abf1p	CTI6
Abf1p	CTK3
Abf1p	CUE3
Abf1p	CUE4
Abf1p	CUP9
Abf1p	CWC2
Abf1p	CWC21
Abf1p	CWC23
Abf1p	CWC25
Abf1p	CYB5
Abf1p	CYC1
Abf1p	CYC3
Abf1p	CYC8
Abf1p	CYK3
Abf1p	CYM1
Abf1p	DAL3
Abf1p	DAL7
Abf1p	DAL81
Abf1p	DAN1
Abf1p	DAN4
Abf1p	DAS1
Abf1p	DBF20
Abf1p	DBP6
Abf1p	DBP9
Abf1p	DCC1
Abf1p	DCP2
Abf1p	DCW1
Abf1p	DED1
Abf1p	DED81
Abf1p	DEF1
Abf1p	DFG10
Abf1p	DFG16
Abf1p	DFM1
Abf1p	DFR1
Abf1p	DGK1
Abf1p	DHH1
Abf1p	DHR2
Abf1p	DIA1
Abf1p	DIB1
Abf1p	DID2
Abf1p	DIM1
Abf1p	DIS3
Abf1p	DMA1
Abf1p	DMA2
Abf1p	DNF1
Abf1p	DOA4
Abf1p	DOG1
Abf1p	DOT6
Abf1p	DPB11
Abf1p	DPH2
Abf1p	DPM1
Abf1p	DPP1
Abf1p	DSD1
Abf1p	DSE1
Abf1p	DSF2
Abf1p	DSL1
Abf1p	DSN1
Abf1p	DSS4
Abf1p	DUF1
Abf1p	DUG2
Abf1p	DUR1,2
Abf1p	DYS1
Abf1p	EAF1
Abf1p	EAF3
Abf1p	EBP2
Abf1p	ECL1
Abf1p	ECM16
Abf1p	ECM19
Abf1p	ECM21
Abf1p	ECM22
Abf1p	ECM25
Abf1p	ECM33
Abf1p	ECM4
Abf1p	EDC1
Abf1p	EDC2
Abf1p	EDC3
Abf1p	EFB1
Abf1p	EFM1
Abf1p	EFT1
Abf1p	EFT2
Abf1p	EGD1
Abf1p	EGD2
Abf1p	EGT2
Abf1p	EHD3
Abf1p	EHT1
Abf1p	ELA1
Abf1p	ELM1
Abf1p	ELP3
Abf1p	EMI2
Abf1p	EMP47
Abf1p	EMW1
Abf1p	ENA1
Abf1p	ENO1
Abf1p	ENO2
Abf1p	ENV7
Abf1p	EOS1
Abf1p	EPL1
Abf1p	EPT1
Abf1p	ERG1
Abf1p	ERG11
Abf1p	ERG20
Abf1p	ERG25
Abf1p	ERG3
Abf1p	ERG9
Abf1p	ERP1
Abf1p	ERP2
Abf1p	ERP3
Abf1p	ERV25
Abf1p	ERV46
Abf1p	ESC2
Abf1p	ESC8
Abf1p	ESF1
Abf1p	EST2
Abf1p	ETP1
Abf1p	EXO5
Abf1p	FAA1
Abf1p	FAB1
Abf1p	FAR3
Abf1p	FAS1
Abf1p	FAT3
Abf1p	FBA1
Abf1p	FCF1
Abf1p	FCF2
Abf1p	FCJ1
Abf1p	FCY1
Abf1p	FCY2
Abf1p	FCY21
Abf1p	FES1
Abf1p	FHL1
Abf1p	FIN1
Abf1p	FIP1
Abf1p	FIT3
Abf1p	FKS1
Abf1p	FLC2
Abf1p	FLO5
Abf1p	FLO9
Abf1p	FMP16
Abf1p	FMP27
Abf1p	FMP33
Abf1p	FMP45
Abf1p	FMP52
Abf1p	FOL2
Abf1p	FOX2
Abf1p	FPK1
Abf1p	FPS1
Abf1p	FRA1
Abf1p	FRM2
Abf1p	FRQ1
Abf1p	FRS1
Abf1p	FRS2
Abf1p	FRT1
Abf1p	FSH1
Abf1p	FTR1
Abf1p	FUI1
Abf1p	FUM1
Abf1p	FUR4
Abf1p	FYV5
Abf1p	FZF1
Abf1p	FZO1
Abf1p	GAD1
Abf1p	GAL3
Abf1p	GAP1
Abf1p	GAS4
Abf1p	GAT1
Abf1p	GAT2
Abf1p	GAT3
Abf1p	GBP2
Abf1p	GCD7
Abf1p	GCN1
Abf1p	GCN2
Abf1p	GCN20
Abf1p	GCN5
Abf1p	GCV3
Abf1p	GDB1
Abf1p	GDH2
Abf1p	GDI1
Abf1p	GEP3
Abf1p	GIC1
Abf1p	GID8
Abf1p	GIP3
Abf1p	GIS1
Abf1p	GIS2
Abf1p	GIT1
Abf1p	GLC3
Abf1p	GLE1
Abf1p	GLG1
Abf1p	GLN1
Abf1p	GLN4
Abf1p	GLO1
Abf1p	GLO3
Abf1p	GLT1
Abf1p	GMH1
Abf1p	GNP1
Abf1p	GON7
Abf1p	GPA1
Abf1p	GPA2
Abf1p	GPD2
Abf1p	GPG1
Abf1p	GPI11
Abf1p	GPI12
Abf1p	GPI17
Abf1p	GPI8
Abf1p	GPN2
Abf1p	GPR1
Abf1p	GRH1
Abf1p	GRS2
Abf1p	GRX1
Abf1p	GRX6
Abf1p	GRX8
Abf1p	GSC2
Abf1p	GSP1
Abf1p	GSP2
Abf1p	GSY1
Abf1p	GSY2
Abf1p	GTT3
Abf1p	GUA1
Abf1p	GUK1
Abf1p	GVP36
Abf1p	HAC1
Abf1p	HAL1
Abf1p	HAP1
Abf1p	HAS1
Abf1p	HAT1
Abf1p	HCM1
Abf1p	HDA2
Abf1p	HEK2
Abf1p	HEL2
Abf1p	HEM12
Abf1p	HEM13
Abf1p	HES1
Abf1p	HFI1
Abf1p	HGH1
Abf1p	HIM1
Abf1p	HIS1
Abf1p	HIS3
Abf1p	HIS4
Abf1p	HIS5
Abf1p	HIS7
Abf1p	HMG2
Abf1p	HMO1
Abf1p	HMS1
Abf1p	HMS2
Abf1p	HNT1
Abf1p	HOF1
Abf1p	HOP1
Abf1p	HOR2
Abf1p	HOR7
Abf1p	HOS2
Abf1p	HPR1
Abf1p	HRB1
Abf1p	HRI1
Abf1p	HRK1
Abf1p	HRR25
Abf1p	HSP10
Abf1p	HSP150
Abf1p	HSP60
Abf1p	HSP82
Abf1p	HST1
Abf1p	HTA2
Abf1p	HTB2
Abf1p	HTZ1
Abf1p	HUA1
Abf1p	HUT1
Abf1p	HXK1
Abf1p	HXK2
Abf1p	HXT2
Abf1p	HYP2
Abf1p	IAH1
Abf1p	ICE2
Abf1p	ICS2
Abf1p	ICS3
Abf1p	IDH1
Abf1p	IDP2
Abf1p	IES3
Abf1p	IES5
Abf1p	IFA38
Abf1p	IGD1
Abf1p	IGO1
Abf1p	IGO2
Abf1p	IME4
Abf1p	IMH1
Abf1p	IML1
Abf1p	IMO32
Abf1p	IMP4
Abf1p	INH1
Abf1p	INN1
Abf1p	INO1
Abf1p	INP1
Abf1p	INP52
Abf1p	IOC2
Abf1p	IOC3
Abf1p	IPP1
Abf1p	IPT1
Abf1p	IQG1
Abf1p	IRC15
Abf1p	IRC18
Abf1p	IRC19
Abf1p	IRC23
Abf1p	IRE1
Abf1p	IRR1
Abf1p	ISC1
Abf1p	ISD11
Abf1p	ISN1
Abf1p	ISR1
Abf1p	IST3
Abf1p	ISU1
Abf1p	ISW2
Abf1p	IXR1
Abf1p	IZH3
Abf1p	IZH4
Abf1p	JEN1
Abf1p	JHD2
Abf1p	JID1
Abf1p	JJJ2
Abf1p	JSN1
Abf1p	KAP95
Abf1p	KAR5
Abf1p	KCS1
Abf1p	KEI1
Abf1p	KEL1
Abf1p	KEL2
Abf1p	KEL3
Abf1p	KES1
Abf1p	KIC1
Abf1p	KIN2
Abf1p	KIN4
Abf1p	KIP1
Abf1p	KNH1
Abf1p	KNS1
Abf1p	KRE1
Abf1p	KRE2
Abf1p	KRE9
Abf1p	KRI1
Abf1p	KRS1
Abf1p	KTI12
Abf1p	KTR1
Abf1p	KTR4
Abf1p	KTR5
Abf1p	KTR6
Abf1p	LAC1
Abf1p	LAG1
Abf1p	LAG2
Abf1p	LAP2
Abf1p	LAS21
Abf1p	LAT1
Abf1p	LCB1
Abf1p	LCB5
Abf1p	LDB16
Abf1p	LDB19
Abf1p	LEU2
Abf1p	LEU3
Abf1p	LEU4
Abf1p	LHS1
Abf1p	LOH1
Abf1p	LOT5
Abf1p	LPD1
Abf1p	LRP1
Abf1p	LSB5
Abf1p	LSM3
Abf1p	LSM4
Abf1p	LSM5
Abf1p	LSM7
Abf1p	LST7
Abf1p	LST8
Abf1p	LTV1
Abf1p	LYP1
Abf1p	LYS14
Abf1p	LYS20
Abf1p	LYS21
Abf1p	LYS4
Abf1p	MAE1
Abf1p	MAK16
Abf1p	MAM3
Abf1p	MCD4
Abf1p	MCK1
Abf1p	MCM16
Abf1p	MCM2
Abf1p	MCM7
Abf1p	MDJ1
Abf1p	MDJ2
Abf1p	MDM20
Abf1p	MDM31
Abf1p	MDM32
Abf1p	MDM35
Abf1p	MDM36
Abf1p	MDM38
Abf1p	MDV1
Abf1p	MDY2
Abf1p	MED2
Abf1p	MEP1
Abf1p	MES1
Abf1p	MET1
Abf1p	MET10
Abf1p	MET13
Abf1p	MET18
Abf1p	MET28
Abf1p	MET3
Abf1p	MET30
Abf1p	MET4
Abf1p	MET5
Abf1p	MET6
Abf1p	MET8
Abf1p	MGA1
Abf1p	MGA2
Abf1p	MGM1
Abf1p	MHP1
Abf1p	MHR1
Abf1p	MIA40
Abf1p	MID2
Abf1p	MIG2
Abf1p	MIR1
Abf1p	MIT1
Abf1p	MKT1
Abf1p	MLC1
Abf1p	MLS1
Abf1p	MMS1
Abf1p	MMT2
Abf1p	MNL2
Abf1p	MNN10
Abf1p	MNN11
Abf1p	MNT2
Abf1p	MOH1
Abf1p	MON1
Abf1p	MOT2
Abf1p	MOT3
Abf1p	MPC2
Abf1p	MPS1
Abf1p	MRH4
Abf1p	MRM1
Abf1p	MRP20
Abf1p	MRP4
Abf1p	MRP49
Abf1p	MRP7
Abf1p	MRPL16
Abf1p	MRPL25
Abf1p	MRPL27
Abf1p	MRPL32
Abf1p	MRPL38
Abf1p	MRPL39
Abf1p	MRPL4
Abf1p	MRPL44
Abf1p	MRPL8
Abf1p	MRPS12
Abf1p	MRPS16
Abf1p	MRPS18
Abf1p	MRPS9
Abf1p	MRS1
Abf1p	MRS3
Abf1p	MSC6
Abf1p	MSF1
Abf1p	MSH1
Abf1p	MSH3
Abf1p	MSL1
Abf1p	MSL5
Abf1p	MSN1
Abf1p	MSN4
Abf1p	MSR1
Abf1p	MSS116
Abf1p	MSS4
Abf1p	MSW1
Abf1p	MTC7
Abf1p	MTM1
Abf1p	MTO1
Abf1p	MTQ1
Abf1p	MUD2
Abf1p	MUM3
Abf1p	MUP1
Abf1p	MVP1
Abf1p	MXR2
Abf1p	MYO1
Abf1p	MYO2
Abf1p	MYO5
Abf1p	NAB2
Abf1p	NAR1
Abf1p	NAS2
Abf1p	NAS6
Abf1p	NAT3
Abf1p	NAT4
Abf1p	NCA3
Abf1p	NCB2
Abf1p	NCE102
Abf1p	NCE103
Abf1p	NCP1
Abf1p	NCS2
Abf1p	NDE1
Abf1p	NDE2
Abf1p	NDI1
Abf1p	NDL1
Abf1p	NEO1
Abf1p	NET1
Abf1p	NFS1
Abf1p	NGR1
Abf1p	NHP2
Abf1p	NHX1
Abf1p	NIP1
Abf1p	NIP7
Abf1p	NIS1
Abf1p	NIT3
Abf1p	NKP2
Abf1p	NMD2
Abf1p	NMD4
Abf1p	NOB1
Abf1p	NOC2
Abf1p	NOC4
Abf1p	NOG1
Abf1p	NOG2
Abf1p	NOP1
Abf1p	NOP14
Abf1p	NOP19
Abf1p	NOP56
Abf1p	NOP58
Abf1p	NPL3
Abf1p	NPP2
Abf1p	NPR1
Abf1p	NPT1
Abf1p	NPY1
Abf1p	NRD1
Abf1p	NRT1
Abf1p	NSE4
Abf1p	NSL1
Abf1p	NTA1
Abf1p	NTH1
Abf1p	NTO1
Abf1p	NUG1
Abf1p	NUP1
Abf1p	NUP100
Abf1p	NUP120
Abf1p	NUP133
Abf1p	NUP157
Abf1p	NUP170
Abf1p	NUP188
Abf1p	NUP42
Abf1p	NUP57
Abf1p	NUP84
Abf1p	NUP85
Abf1p	NUS1
Abf1p	OAZ1
Abf1p	OCA2
Abf1p	OCA5
Abf1p	OCH1
Abf1p	OLE1
Abf1p	OPT1
Abf1p	OPY1
Abf1p	ORM1
Abf1p	OSH6
Abf1p	OYE2
Abf1p	PAA1
Abf1p	PAB1
Abf1p	PAC1
Abf1p	PAF1
Abf1p	PAL1
Abf1p	PAN5
Abf1p	PAN6
Abf1p	PAU10
Abf1p	PAU11
Abf1p	PAU22
Abf1p	PAU24
Abf1p	PAU5
Abf1p	PBP2
Abf1p	PCL5
Abf1p	PCL9
Abf1p	PCS60
Abf1p	PCT1
Abf1p	PDB1
Abf1p	PDC1
Abf1p	PDC6
Abf1p	PDR10
Abf1p	PDR11
Abf1p	PDR15
Abf1p	PDR16
Abf1p	PDR3
Abf1p	PDS5
Abf1p	PEF1
Abf1p	PEP7
Abf1p	PEP8
Abf1p	PET112
Abf1p	PET123
Abf1p	PET20
Abf1p	PET494
Abf1p	PET54
Abf1p	PET9
Abf1p	PEX1
Abf1p	PEX10
Abf1p	PEX12
Abf1p	PEX2
Abf1p	PEX25
Abf1p	PEX3
Abf1p	PEX5
Abf1p	PFK1
Abf1p	PFK2
Abf1p	PGA1
Abf1p	PGA2
Abf1p	PGC1
Abf1p	PGD1
Abf1p	PGI1
Abf1p	PGS1
Abf1p	PHB2
Abf1p	PHM8
Abf1p	PHO13
Abf1p	PHO2
Abf1p	PHO4
Abf1p	PHO8
Abf1p	PHO85
Abf1p	PHO86
Abf1p	PHO88
Abf1p	PIH1
Abf1p	PIK1
Abf1p	PIL1
Abf1p	PIN3
Abf1p	PKH2
Abf1p	PKP1
Abf1p	PLB3
Abf1p	PMA2
Abf1p	PMC1
Abf1p	PMI40
Abf1p	PML39
Abf1p	PMP2
Abf1p	PMP3
Abf1p	PMT2
Abf1p	PNC1
Abf1p	PNO1
Abf1p	POB3
Abf1p	POC4
Abf1p	POL1
Abf1p	POL5
Abf1p	POM152
Abf1p	POP2
Abf1p	POP6
Abf1p	POR2
Abf1p	POS5
Abf1p	PPH3
Abf1p	PPQ1
Abf1p	PPT1
Abf1p	PRC1
Abf1p	PRD1
Abf1p	PRE6
Abf1p	PRE7
Abf1p	PRI2
Abf1p	PRM10
Abf1p	PRM2
Abf1p	PRM4
Abf1p	PRM5
Abf1p	PRM9
Abf1p	PRP38
Abf1p	PRP4
Abf1p	PRP40
Abf1p	PRP45
Abf1p	PRP46
Abf1p	PRP8
Abf1p	PRR2
Abf1p	PRT1
Abf1p	PRX1
Abf1p	PRY1
Abf1p	PRY3
Abf1p	PSF2
Abf1p	PSK1
Abf1p	PSO2
Abf1p	PSP1
Abf1p	PSR1
Abf1p	PST1
Abf1p	PSY2
Abf1p	PTA1
Abf1p	PTC3
Abf1p	PTC5
Abf1p	PTH2
Abf1p	PTK1
Abf1p	PTK2
Abf1p	PTM1
Abf1p	PTR3
Abf1p	PUF3
Abf1p	PUG1
Abf1p	PUP1
Abf1p	PUP2
Abf1p	PUP3
Abf1p	PUS1
Abf1p	PUS2
Abf1p	PUT1
Abf1p	PUT2
Abf1p	PUT3
Abf1p	PUT4
Abf1p	PXA2
Abf1p	PYC1
Abf1p	PYC2
Abf1p	PYK2
Abf1p	PZF1
Abf1p	QCR2
Abf1p	QCR6
Abf1p	QCR8
Abf1p	QCR9
Abf1p	QDR2
Abf1p	RAD14
Abf1p	RAD16
Abf1p	RAD23
Abf1p	RAD24
Abf1p	RAD27
Abf1p	RAD3
Abf1p	RAD50
Abf1p	RAD51
Abf1p	RAD53
Abf1p	RAD54
Abf1p	RAS2
Abf1p	RBA50
Abf1p	RBS1
Abf1p	RCF2
Abf1p	RCN2
Abf1p	RCR2
Abf1p	RDR1
Abf1p	RDS1
Abf1p	REB1
Abf1p	REF2
Abf1p	REH1
Abf1p	RER1
Abf1p	RET1
Abf1p	REX2
Abf1p	RFA2
Abf1p	RGA1
Abf1p	RGD2
Abf1p	RGI2
Abf1p	RGL1
Abf1p	RGS2
Abf1p	RGT2
Abf1p	RHO1
Abf1p	RHR2
Abf1p	RIB1
Abf1p	RIB3
Abf1p	RIB4
Abf1p	RIF2
Abf1p	RIM101
Abf1p	RIM8
Abf1p	RIM9
Abf1p	RIO2
Abf1p	RIX7
Abf1p	RKM3
Abf1p	RLF2
Abf1p	RLI1
Abf1p	RMD9
Abf1p	RMI1
Abf1p	RMR1
Abf1p	RNA1
Abf1p	RNA14
Abf1p	RNH1
Abf1p	RNH202
Abf1p	RNP1
Abf1p	ROG1
Abf1p	ROM2
Abf1p	ROT1
Abf1p	RPA12
Abf1p	RPA14
Abf1p	RPB10
Abf1p	RPB2
Abf1p	RPB7
Abf1p	RPB8
Abf1p	RPC19
Abf1p	RPC25
Abf1p	RPC31
Abf1p	RPC40
Abf1p	RPC82
Abf1p	RPE1
Abf1p	RPF1
Abf1p	RPF2
Abf1p	RPG1
Abf1p	RPL12b
Abf1p	RPL13a
Abf1p	RPL13b
Abf1p	RPL15a
Abf1p	RPL15b
Abf1p	RPL16a
Abf1p	RPL18b
Abf1p	RPL20a
Abf1p	RPL22a
Abf1p	RPL26a
Abf1p	RPL27a
Abf1p	RPL29
Abf1p	RPL2a
Abf1p	RPL2b
Abf1p	RPL3
Abf1p	RPL31b
Abf1p	RPL33a
Abf1p	RPL34a
Abf1p	RPL34b
Abf1p	RPL35b
Abf1p	RPL41b
Abf1p	RPL43b
Abf1p	RPL4a
Abf1p	RPL6b
Abf1p	RPL8b
Abf1p	RPN1
Abf1p	RPN10
Abf1p	RPN13
Abf1p	RPN4
Abf1p	RPN5
Abf1p	RPN8
Abf1p	RPN9
Abf1p	RPO26
Abf1p	RPO31
Abf1p	RPO41
Abf1p	RPP0
Abf1p	RPP1
Abf1p	RPP1a
Abf1p	RPP1b
Abf1p	RPP2a
Abf1p	RPS0a
Abf1p	RPS10a
Abf1p	RPS10b
Abf1p	RPS13
Abf1p	RPS14b
Abf1p	RPS15
Abf1p	RPS16a
Abf1p	RPS16b
Abf1p	RPS19b
Abf1p	RPS2
Abf1p	RPS21a
Abf1p	RPS22b
Abf1p	RPS23a
Abf1p	RPS23b
Abf1p	RPS24b
Abf1p	RPS25b
Abf1p	RPS26a
Abf1p	RPS26b
Abf1p	RPS28a
Abf1p	RPS28b
Abf1p	RPS29a
Abf1p	RPS29b
Abf1p	RPS4a
Abf1p	RPS5
Abf1p	RPT3
Abf1p	RPT5
Abf1p	RQC1
Abf1p	RRD2
Abf1p	RRG9
Abf1p	RRI2
Abf1p	RRP12
Abf1p	RRP17
Abf1p	RRP3
Abf1p	RRP4
Abf1p	RRP40
Abf1p	RRP42
Abf1p	RRP45
Abf1p	RRP5
Abf1p	RRP7
Abf1p	RRP8
Abf1p	RRP9
Abf1p	RRT6
Abf1p	RSA4
Abf1p	RSB1
Abf1p	RSC1
Abf1p	RSC2
Abf1p	RSC3
Abf1p	RSC30
Abf1p	RSC4
Abf1p	RSC6
Abf1p	RSE1
Abf1p	RSF2
Abf1p	RSM10
Abf1p	RSM19
Abf1p	RSP5
Abf1p	RTA1
Abf1p	RTC2
Abf1p	RTG1
Abf1p	RTG3
Abf1p	RTK1
Abf1p	RTN1
Abf1p	RTS2
Abf1p	RTS3
Abf1p	RTT10
Abf1p	RVB2
Abf1p	RXT2
Abf1p	SAM37
Abf1p	SAP4
Abf1p	SAS5
Abf1p	SBH2
Abf1p	SCC4
Abf1p	SCD6
Abf1p	SCL1
Abf1p	SCM3
Abf1p	SCS22
Abf1p	SCS3
Abf1p	SCT1
Abf1p	SDP1
Abf1p	SDS23
Abf1p	SDS24
Abf1p	SEA4
Abf1p	SEC11
Abf1p	SEC14
Abf1p	SEC18
Abf1p	SEC21
Abf1p	SEC23
Abf1p	SEC27
Abf1p	SEC28
Abf1p	SEC61
Abf1p	SEC62
Abf1p	SEC72
Abf1p	SED4
Abf1p	SEF1
Abf1p	SEM1
Abf1p	SER1
Abf1p	SES1
Abf1p	SET2
Abf1p	SET3
Abf1p	SET4
Abf1p	SFB2
Abf1p	SFC1
Abf1p	SFG1
Abf1p	SFH5
Abf1p	SFP1
Abf1p	SFT2
Abf1p	SGF11
Abf1p	SGM1
Abf1p	SGT1
Abf1p	SHE10
Abf1p	SHE4
Abf1p	SHM2
Abf1p	SHR5
Abf1p	SIP1
Abf1p	SIP4
Abf1p	SIS2
Abf1p	SIT4
Abf1p	SIZ1
Abf1p	SKI6
Abf1p	SKI7
Abf1p	SKP1
Abf1p	SKT5
Abf1p	SKY1
Abf1p	SLA1
Abf1p	SLA2
Abf1p	SLD3
Abf1p	SLD5
Abf1p	SLD7
Abf1p	SLK19
Abf1p	SLM1
Abf1p	SLM4
Abf1p	SLS1
Abf1p	SLX5
Abf1p	SLZ1
Abf1p	SMC1
Abf1p	SMC2
Abf1p	SMC5
Abf1p	SMF2
Abf1p	SMP1
Abf1p	SMT3
Abf1p	SMX2
Abf1p	SMX3
Abf1p	SMY1
Abf1p	SNA2
Abf1p	SNA3
Abf1p	SNA4
Abf1p	SNC2
Abf1p	SNF1
Abf1p	SNF11
Abf1p	SNF2
Abf1p	SNF3
Abf1p	SNF7
Abf1p	SNG1
Abf1p	SNL1
Abf1p	SNN1
Abf1p	SNO3
Abf1p	SNR14
Abf1p	SNR47
Abf1p	SNR57
Abf1p	SNU114
Abf1p	SNU13
Abf1p	SNZ3
Abf1p	SOD1
Abf1p	SOF1
Abf1p	SOH1
Abf1p	SOL3
Abf1p	SOL4
Abf1p	SOP4
Abf1p	SOV1
Abf1p	SPB1
Abf1p	SPC110
Abf1p	SPC25
Abf1p	SPC42
Abf1p	SPE1
Abf1p	SPF1
Abf1p	SPG3
Abf1p	SPG4
Abf1p	SPO23
Abf1p	SPP2
Abf1p	SPP41
Abf1p	SPR3
Abf1p	SPT15
Abf1p	SPT16
Abf1p	SPT23
Abf1p	SPT8
Abf1p	SRB2
Abf1p	SRB8
Abf1p	SRF1
Abf1p	SRL2
Abf1p	SRN2
Abf1p	SRO77
Abf1p	SRP1
Abf1p	SRP68
Abf1p	SRP72
Abf1p	SRS2
Abf1p	SRY1
Abf1p	SSA1
Abf1p	SSA3
Abf1p	SSB1
Abf1p	SSC1
Abf1p	SSE1
Abf1p	SSE2
Abf1p	SSF1
Abf1p	SSF2
Abf1p	SSH1
Abf1p	SSH4
Abf1p	SSL1
Abf1p	SSL2
Abf1p	SSM4
Abf1p	SSO1
Abf1p	SSU72
Abf1p	SSZ1
Abf1p	STB3
Abf1p	STE13
Abf1p	STE18
Abf1p	STE20
Abf1p	STE23
Abf1p	STE24
Abf1p	STE3
Abf1p	STE4
Abf1p	STE50
Abf1p	STE7
Abf1p	STF1
Abf1p	STI1
Abf1p	STN1
Abf1p	STO1
Abf1p	STP1
Abf1p	STP2
Abf1p	STP3
Abf1p	STR3
Abf1p	SUA5
Abf1p	SUB2
Abf1p	SUF4
Abf1p	SUI1
Abf1p	SUI3
Abf1p	SUM1
Abf1p	SUP35
Abf1p	SUP45
Abf1p	SUP54
Abf1p	SUR7
Abf1p	SUT1
Abf1p	SVF1
Abf1p	SWA2
Abf1p	SWC3
Abf1p	SWC5
Abf1p	SWC7
Abf1p	SWD1
Abf1p	SWI1
Abf1p	SWI3
Abf1p	SWI4
Abf1p	SWP82
Abf1p	SWR1
Abf1p	SYF2
Abf1p	SYG1
Abf1p	SYO1
Abf1p	TAD3
Abf1p	TAF11
Abf1p	TAF12
Abf1p	TAF14
Abf1p	TAF4
Abf1p	TAF5
Abf1p	TAF9
Abf1p	TAH11
Abf1p	TAT2
Abf1p	TCB2
Abf1p	TCD2
Abf1p	TCO89
Abf1p	TCP1
Abf1p	TDA1
Abf1p	TDA11
Abf1p	TDA2
Abf1p	TDA3
Abf1p	TDA4
Abf1p	TDA9
Abf1p	TDH2
Abf1p	TDH3
Abf1p	TEF2
Abf1p	TFA1
Abf1p	TFB1
Abf1p	TFB6
Abf1p	TFC6
Abf1p	TFG1
Abf1p	TFS1
Abf1p	THI2
Abf1p	THI21
Abf1p	THI4
Abf1p	THO1
Abf1p	THO2
Abf1p	THP3
Abf1p	THR4
Abf1p	TIF1
Abf1p	TIF11
Abf1p	TIF34
Abf1p	TIF35
Abf1p	TIF6
Abf1p	TIM10
Abf1p	TIM11
Abf1p	TIM18
Abf1p	TIM22
Abf1p	TIM23
Abf1p	TIM8
Abf1p	TIP20
Abf1p	tK(CUU)D1
Abf1p	TKL2
Abf1p	TLG2
Abf1p	TMA10
Abf1p	TMA19
Abf1p	TMA20
Abf1p	TMA46
Abf1p	TMA7
Abf1p	TOM22
Abf1p	TOM6
Abf1p	TOM70
Abf1p	TOM71
Abf1p	TOS1
Abf1p	TOS6
Abf1p	TPD3
Abf1p	TPM1
Abf1p	TPM2
Abf1p	TPO1
Abf1p	TRK1
Abf1p	TRM112
Abf1p	TRM2
Abf1p	TRM44
Abf1p	TRM5
Abf1p	TRM9
Abf1p	TRP3
Abf1p	TRR1
Abf1p	TRS120
Abf1p	TSA1
Abf1p	TSC10
Abf1p	TSL1
Abf1p	TSR1
Abf1p	TUB1
Abf1p	TUB2
Abf1p	TUB4
Abf1p	TUP1
Abf1p	TYE7
Abf1p	TYR1
Abf1p	TYS1
Abf1p	UBA1
Abf1p	UBA4
Abf1p	UBC13
Abf1p	UBC8
Abf1p	UBI4
Abf1p	UBP1
Abf1p	UBP10
Abf1p	UBP14
Abf1p	UBP6
Abf1p	UBR1
Abf1p	UBR2
Abf1p	UBX2
Abf1p	UBX5
Abf1p	UFD2
Abf1p	UGA3
Abf1p	ULP2
Abf1p	ULS1
Abf1p	UME6
Abf1p	UPS1
Abf1p	URA6
Abf1p	URA7
Abf1p	URB1
Abf1p	URB2
Abf1p	USV1
Abf1p	UTP11
Abf1p	UTP13
Abf1p	UTP15
Abf1p	UTP25
Abf1p	UTP5
Abf1p	UTP8
Abf1p	UTP9
Abf1p	UTR5
Abf1p	VAB2
Abf1p	VAC14
Abf1p	VAC17
Abf1p	VBA2
Abf1p	VHR2
Abf1p	VHS2
Abf1p	VID22
Abf1p	VID24
Abf1p	VID27
Abf1p	VMA11
Abf1p	VMA3
Abf1p	VNX1
Abf1p	VPS13
Abf1p	VPS24
Abf1p	VPS27
Abf1p	VPS33
Abf1p	VPS60
Abf1p	VPS61
Abf1p	VPS62
Abf1p	VPS63
Abf1p	VPS68
Abf1p	VPS74
Abf1p	VRG4
Abf1p	VTC1
Abf1p	VTI1
Abf1p	WHI4
Abf1p	WSC4
Abf1p	WTM1
Abf1p	XKS1
Abf1p	YAF9
Abf1p	YAL037W
Abf1p	YAP1801
Abf1p	YAP5
Abf1p	YAP6
Abf1p	YAR028W
Abf1p	YAR029W
Abf1p	YAR066W
Abf1p	YAR1
Abf1p	YAT1
Abf1p	YAT2
Abf1p	YBL048W
Abf1p	YBL073W
Abf1p	YBL101W-A
Abf1p	YBL108W
Abf1p	YBL109W
Abf1p	YBL111C
Abf1p	YBL112C
Abf1p	YBL113C
Abf1p	YBR012W-A
Abf1p	YBR012W-B
Abf1p	YBR051W
Abf1p	YBR063C
Abf1p	YBR085C-A
Abf1p	YBR096W
Abf1p	YBR116C
Abf1p	YBR124W
Abf1p	YBR134W
Abf1p	YBR138C
Abf1p	YBR139W
Abf1p	YBR178W
Abf1p	YBR197C
Abf1p	YBR209W
Abf1p	YBR219C
Abf1p	YBR220C
Abf1p	YBR224W
Abf1p	YBR225W
Abf1p	YBR277C
Abf1p	YBR284W
Abf1p	YCG1
Abf1p	YCH1
Abf1p	YCK2
Abf1p	YCK3
Abf1p	YCL001W-A
Abf1p	YCR001W
Abf1p	YCR025C
Abf1p	YCR049C
Abf1p	YCR050C
Abf1p	YCR051W
Abf1p	YCR064C
Abf1p	YCR085W
Abf1p	YCR102W-A
Abf1p	YDJ1
Abf1p	YDL012C
Abf1p	YDL016C
Abf1p	YDL026W
Abf1p	YDL032W
Abf1p	YDL034W
Abf1p	YDL073W
Abf1p	YDL094C
Abf1p	YDL124W
Abf1p	YDL144C
Abf1p	YDL172C
Abf1p	YDL180W
Abf1p	YDL183C
Abf1p	YDL196W
Abf1p	YDL221W
Abf1p	YDR008C
Abf1p	YDR029W
Abf1p	YDR034C-A
Abf1p	YDR034W-B
Abf1p	YDR061W
Abf1p	YDR095C
Abf1p	YDR098C-A
Abf1p	YDR098C-B
Abf1p	YDR154C
Abf1p	YDR157W
Abf1p	YDR186C
Abf1p	YDR215C
Abf1p	YDR220C
Abf1p	YDR261C-C
Abf1p	YDR261C-D
Abf1p	YDR261W-A
Abf1p	YDR261W-B
Abf1p	YDR262W
Abf1p	YDR274C
Abf1p	YDR327W
Abf1p	YDR338C
Abf1p	YDR340W
Abf1p	YDR344C
Abf1p	YDR360W
Abf1p	YDR365W-A
Abf1p	YDR365W-B
Abf1p	YDR366C
Abf1p	YDR374C
Abf1p	YDR396W
Abf1p	YDR426C
Abf1p	YDR431W
Abf1p	YDR433W
Abf1p	YDR442W
Abf1p	YDR445C
Abf1p	YDR476C
Abf1p	YDR541C
Abf1p	YDR543C
Abf1p	YDR544C
Abf1p	YEA4
Abf1p	YEA6
Abf1p	YEF3
Abf1p	YEH1
Abf1p	YEL074W
Abf1p	YEL075C
Abf1p	YEL076C
Abf1p	YEL076C-A
Abf1p	YEL077C
Abf1p	YEL1
Abf1p	YEN1
Abf1p	YER066C-A
Abf1p	YER091C-A
Abf1p	YER130C
Abf1p	YER137C-A
Abf1p	YER138W-A
Abf1p	YER158C
Abf1p	YER184C
Abf1p	YER188W
Abf1p	YER189W
Abf1p	YET3
Abf1p	YFL032W
Abf1p	YFL063W
Abf1p	YFL064C
Abf1p	YFL065C
Abf1p	YFR020W
Abf1p	YFR035C
Abf1p	YGL010W
Abf1p	YGL034C
Abf1p	YGL036W
Abf1p	YGL039W
Abf1p	YGL069C
Abf1p	YGL109W
Abf1p	YGL114W
Abf1p	YGL117W
Abf1p	YGL118C
Abf1p	YGL138C
Abf1p	YGL260W
Abf1p	YGP1
Abf1p	YGR035C
Abf1p	YGR050C
Abf1p	YGR053C
Abf1p	YGR054W
Abf1p	YGR067C
Abf1p	YGR069W
Abf1p	YGR073C
Abf1p	YGR117C
Abf1p	YGR122W
Abf1p	YGR161W-A
Abf1p	YGR161W-B
Abf1p	YGR176W
Abf1p	YGR182C
Abf1p	YGR242W
Abf1p	YGR269W
Abf1p	YHB1
Abf1p	YHL049C
Abf1p	YHR022C
Abf1p	YHR033W
Abf1p	YHR035W
Abf1p	YHR045W
Abf1p	YHR050W-A
Abf1p	YHR078W
Abf1p	YHR080C
Abf1p	YHR130C
Abf1p	YHR131C
Abf1p	YHR139C-A
Abf1p	YHR140W
Abf1p	YHR145C
Abf1p	YHR177W
Abf1p	YHR210C
Abf1p	YIA6
Abf1p	YIG1
Abf1p	YIL012W
Abf1p	YIL024C
Abf1p	YIL025C
Abf1p	YIL032C
Abf1p	YIL054W
Abf1p	YIL055C
Abf1p	YIL067C
Abf1p	YIL077C
Abf1p	YIL102C
Abf1p	YIL141W
Abf1p	YIL174W
Abf1p	YIL175W
Abf1p	YIL177C
Abf1p	YJL016W
Abf1p	YJL067W
Abf1p	YJL068C
Abf1p	YJL070C
Abf1p	YJL075C
Abf1p	YJL107C
Abf1p	YJL119C
Abf1p	YJL150W
Abf1p	YJL152W
Abf1p	YJL160C
Abf1p	YJL175W
Abf1p	YJL202C
Abf1p	YJL225C
Abf1p	YJR026W
Abf1p	YJR027W
Abf1p	YJR028W
Abf1p	YJR029W
Abf1p	YJR030C
Abf1p	YJR079W
Abf1p	YJR085C
Abf1p	YJR087W
Abf1p	YJR115W
Abf1p	YJR120W
Abf1p	YJR128W
Abf1p	YJR146W
Abf1p	YJR149W
Abf1p	YJU3
Abf1p	YKL023W
Abf1p	YKL030W
Abf1p	YKL031W
Abf1p	YKL044W
Abf1p	YKL053W
Abf1p	YKL063C
Abf1p	YKL066W
Abf1p	YKL169C
Abf1p	YKL177W
Abf1p	YKR015C
Abf1p	YKR033C
Abf1p	YKR047W
Abf1p	YKR073C
Abf1p	YKR075C
Abf1p	YKT6
Abf1p	YKU80
Abf1p	YLF2
Abf1p	YLL017W
Abf1p	YLL020C
Abf1p	YLL030C
Abf1p	YLL032C
Abf1p	YLL037W
Abf1p	YLL065W
Abf1p	YLL066C
Abf1p	YLL067C
Abf1p	YLR012C
Abf1p	YLR030W
Abf1p	YLR046C
Abf1p	YLR053C
Abf1p	YLR111W
Abf1p	YLR118C
Abf1p	YLR122C
Abf1p	YLR123C
Abf1p	YLR124W
Abf1p	YLR152C
Abf1p	YLR173W
Abf1p	YLR179C
Abf1p	YLR225C
Abf1p	YLR230W
Abf1p	YLR232W
Abf1p	YLR255C
Abf1p	YLR256W-A
Abf1p	YLR257W
Abf1p	YLR278C
Abf1p	YLR279W
Abf1p	YLR281C
Abf1p	YLR282C
Abf1p	YLR283W
Abf1p	YLR294C
Abf1p	YLR296W
Abf1p	YLR317W
Abf1p	YLR334C
Abf1p	YLR346C
Abf1p	YLR349W
Abf1p	YLR352W
Abf1p	YLR365W
Abf1p	YLR366W
Abf1p	YLR400W
Abf1p	YLR402W
Abf1p	YLR407W
Abf1p	YLR460C
Abf1p	YLR462W
Abf1p	YLR463C
Abf1p	YLR464W
Abf1p	YLR465C
Abf1p	YME1
Abf1p	YME2
Abf1p	YML003W
Abf1p	YML053C
Abf1p	YML082W
Abf1p	YML083C
Abf1p	YML084W
Abf1p	YML090W
Abf1p	YML100W-A
Abf1p	YML119W
Abf1p	YML133C
Abf1p	YMR010W
Abf1p	YMR027W
Abf1p	YMR050C
Abf1p	YMR051C
Abf1p	YMR082C
Abf1p	YMR084W
Abf1p	YMR122C
Abf1p	YMR122W-A
Abf1p	YMR124W
Abf1p	YMR130W
Abf1p	YMR135W-A
Abf1p	YMR144W
Abf1p	YMR147W
Abf1p	YMR178W
Abf1p	YMR193C-A
Abf1p	YMR194C-A
Abf1p	YMR196W
Abf1p	YMR206W
Abf1p	YMR295C
Abf1p	YMR316C-A
Abf1p	YMR317W
Abf1p	YNG2
Abf1p	YNK1
Abf1p	YNL040W
Abf1p	YNL057W
Abf1p	YNL058C
Abf1p	YNL108C
Abf1p	YNL114C
Abf1p	YNL115C
Abf1p	YNL120C
Abf1p	YNL140C
Abf1p	YNL144C
Abf1p	YNL146W
Abf1p	YNL190W
Abf1p	YNL193W
Abf1p	YNL194C
Abf1p	YNL208W
Abf1p	YNL211C
Abf1p	YNL234W
Abf1p	YNL235C
Abf1p	YNL284C-A
Abf1p	YNL337W
Abf1p	YNR034W-A
Abf1p	YNR048W
Abf1p	YNR064C
Abf1p	YOL019W
Abf1p	YOL035C
Abf1p	YOL036W
Abf1p	YOL037C
Abf1p	YOL103W-A
Abf1p	YOL103W-B
Abf1p	YOL134C
Abf1p	YOL166C
Abf1p	YOR050C
Abf1p	YOR059C
Abf1p	YOR062C
Abf1p	YOR072W
Abf1p	YOR146W
Abf1p	YOR152C
Abf1p	YOR170W
Abf1p	YOR186W
Abf1p	YOR203W
Abf1p	YOR214C
Abf1p	YOR268C
Abf1p	YOR292C
Abf1p	YOR302W
Abf1p	YOR309C
Abf1p	YOR338W
Abf1p	YOR342C
Abf1p	YOR343C
Abf1p	YOR376W
Abf1p	YOR379C
Abf1p	YOR390W
Abf1p	YPK9
Abf1p	YPL025C
Abf1p	YPL062W
Abf1p	YPL067C
Abf1p	YPL150W
Abf1p	YPL229W
Abf1p	YPL257W-A
Abf1p	YPL257W-B
Abf1p	YPL272C
Abf1p	YPL279C
Abf1p	YPP1
Abf1p	YPQ1
Abf1p	YPR014C
Abf1p	YPR050C
Abf1p	YPR063C
Abf1p	YPR064W
Abf1p	YPR098C
Abf1p	YPR1
Abf1p	YPR109W
Abf1p	YPR117W
Abf1p	YPR126C
Abf1p	YPR127W
Abf1p	YPR153W
Abf1p	YPR170C
Abf1p	YPR172W
Abf1p	YPR202W
Abf1p	YPR203W
Abf1p	YPS3
Abf1p	YPT1
Abf1p	YPT10
Abf1p	YPT6
Abf1p	YRA1
Abf1p	YRB1
Abf1p	YRF1-1
Abf1p	YRF1-2
Abf1p	YRF1-3
Abf1p	YRF1-4
Abf1p	YRF1-5
Abf1p	YRF1-7
Abf1p	YRO2
Abf1p	YSP2
Abf1p	YSW1
Abf1p	YSY6
Abf1p	YTA7
Abf1p	YTH1
Abf1p	ZEO1
Abf1p	ZRT2
Abf1p	ZWF1
Aca1p	ATP4
Aca1p	IRC3
Ace2p	AAD16
Ace2p	AAD6
Ace2p	AFG2
Ace2p	AIM44
Ace2p	AIM9
Ace2p	AMN1
Ace2p	API2
Ace2p	ASH1
Ace2p	ASN2
Ace2p	BAT2
Ace2p	BEM2
Ace2p	BIO2
Ace2p	BMH1
Ace2p	BUD9
Ace2p	CDC26
Ace2p	CHS7
Ace2p	CLN3
Ace2p	CPR1
Ace2p	CTS1
Ace2p	CUE4
Ace2p	DSE1
Ace2p	DSE2
Ace2p	DSE3
Ace2p	DSE4
Ace2p	ECM32
Ace2p	EGD2
Ace2p	EGT2
Ace2p	ERG6
Ace2p	EXG1
Ace2p	FAA3
Ace2p	FRS2
Ace2p	GAT1
Ace2p	GDH3
Ace2p	GLO1
Ace2p	GTR1
Ace2p	GUF1
Ace2p	HMS2
Ace2p	Ho
Ace2p	HOM2
Ace2p	HOT13
Ace2p	HSP150
Ace2p	ICP55
Ace2p	ICS2
Ace2p	IFA38
Ace2p	IGD1
Ace2p	ISR1
Ace2p	ITC1
Ace2p	KSS1
Ace2p	LCP5
Ace2p	LSM3
Ace2p	MCM2
Ace2p	MCR1
Ace2p	MDH1
Ace2p	MDJ2
Ace2p	MDM31
Ace2p	MGM101
Ace2p	MIT1
Ace2p	MRP8
Ace2p	MRPL4
Ace2p	MSR1
Ace2p	MTC3
Ace2p	MUM2
Ace2p	NIS1
Ace2p	NSA2
Ace2p	NUP100
Ace2p	NVJ1
Ace2p	OCA5
Ace2p	OM14
Ace2p	OST5
Ace2p	OTU2
Ace2p	OXA1
Ace2p	PAH1
Ace2p	PCL10
Ace2p	PCL2
Ace2p	PCL8
Ace2p	PET122
Ace2p	PIR1
Ace2p	PMA1
Ace2p	PRY3
Ace2p	PSA1
Ace2p	PST1
Ace2p	RAS2
Ace2p	RCF2
Ace2p	REE1
Ace2p	REG2
Ace2p	RMI1
Ace2p	ROT2
Ace2p	RPA14
Ace2p	RPA34
Ace2p	RPS30a
Ace2p	RPS4a
Ace2p	RSP5
Ace2p	RUP1
Ace2p	SAP4
Ace2p	SBH1
Ace2p	SCP160
Ace2p	SCW11
Ace2p	SER3
Ace2p	SFL1
Ace2p	SHE10
Ace2p	SIC1
Ace2p	SNA2
Ace2p	SNQ2
Ace2p	SNR60
Ace2p	TAH11
Ace2p	TIM23
Ace2p	TPM1
Ace2p	TPS3
Ace2p	TSL1
Ace2p	UBP6
Ace2p	UTH1
Ace2p	VID30
Ace2p	VPS55
Ace2p	WSC4
Ace2p	WTM1
Ace2p	YAP1
Ace2p	YCK2
Ace2p	YDL041W
Ace2p	YDR010C
Ace2p	YDR154C
Ace2p	YDR157W
Ace2p	YEA6
Ace2p	YEL008W
Ace2p	YER077C
Ace2p	YER078W-A
Ace2p	YER079W
Ace2p	YER152C
Ace2p	YER189W
Ace2p	YGL006W-A
Ace2p	YGL007C-A
Ace2p	YGL007W
Ace2p	YGR042W
Ace2p	YGR125W
Ace2p	YGR283C
Ace2p	YHB1
Ace2p	YHL012W
Ace2p	YJL075C
Ace2p	YJL077W-B
Ace2p	YJL160C
Ace2p	YJR146W
Ace2p	YJR149W
Ace2p	YKL151C
Ace2p	YKR040C
Ace2p	YKR041W
Ace2p	YLR194C
Ace2p	YML003W
Ace2p	YML100W-A
Ace2p	YMR134W
Ace2p	YMR135W-A
Ace2p	YMR262W
Ace2p	YOR314W
Ace2p	YPL025C
Ace2p	YRF1-2
Ace2p	YRF1-7
Ace2p	ZWF1
Adr1p	AAC1
Adr1p	ACA1
Adr1p	ACC1
Adr1p	ACH1
Adr1p	ACO1
Adr1p	ACS1
Adr1p	ACT1
Adr1p	ADH1
Adr1p	ADH2
Adr1p	ADY2
Adr1p	AGP1
Adr1p	AHA1
Adr1p	AHC1
[truncated: 34,438 more rows]
